# Supplementary material for: Enhancing nanopore adaptive sampling for PromethION using readfish at scale
Source: HighWire-hosted journal article supplement (doi:10.1101/gr.279329.124), 2025-01-30

## Batch Mean Read length

● 0 - 1000    ● 1001 - 2000    ● 2001 - 3000    ● 3001 - 4000    ● 4001 - 5000    ● > 5000

Dorado Alignments with Gridion

**A**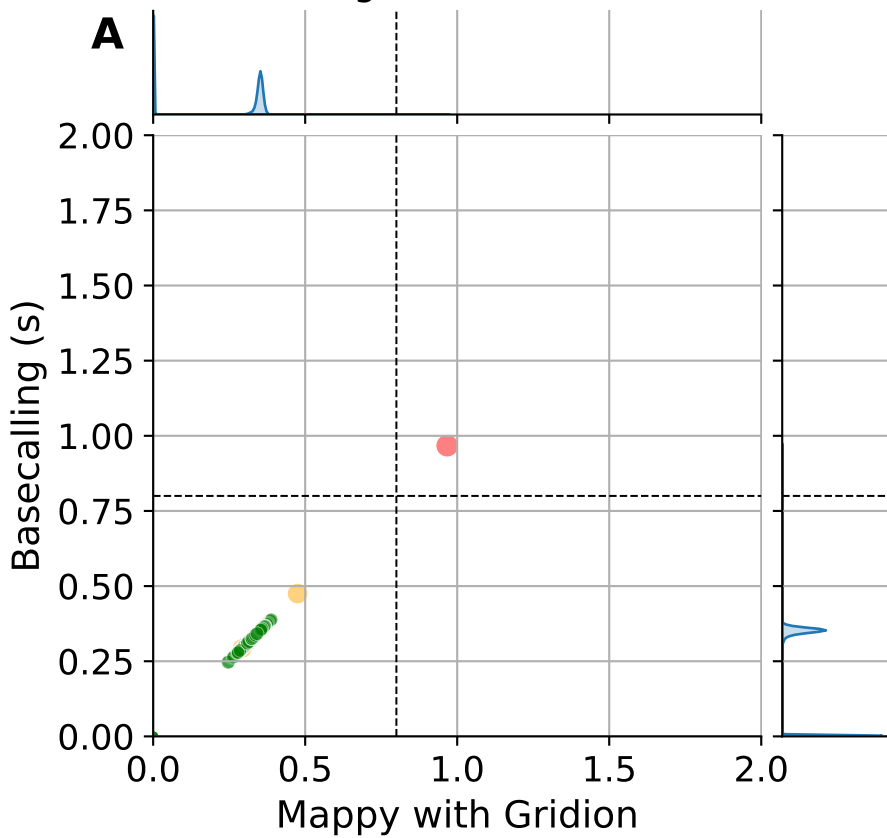

Dorado Alignments with PromethION

**B**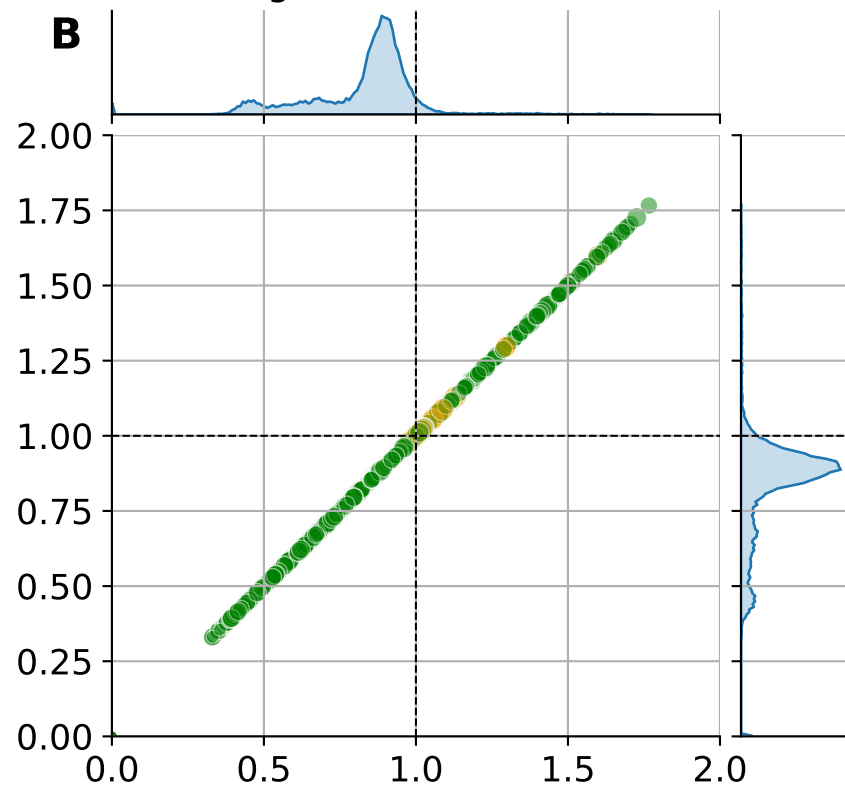

Mappy with Gridion

**C**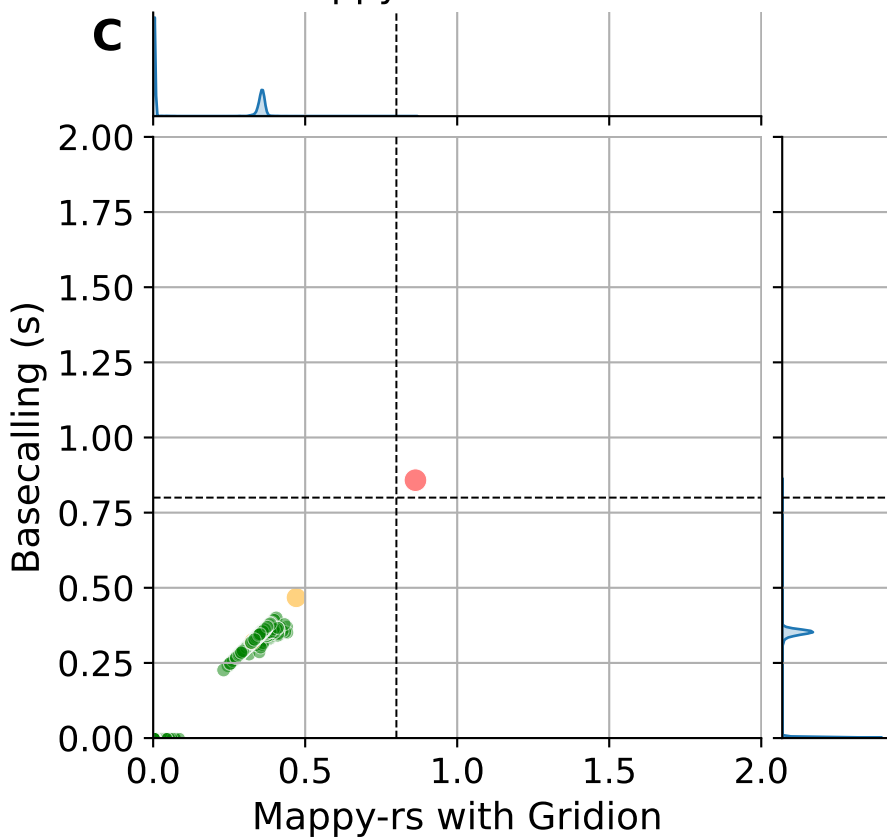

Mappy with PromethION

**D**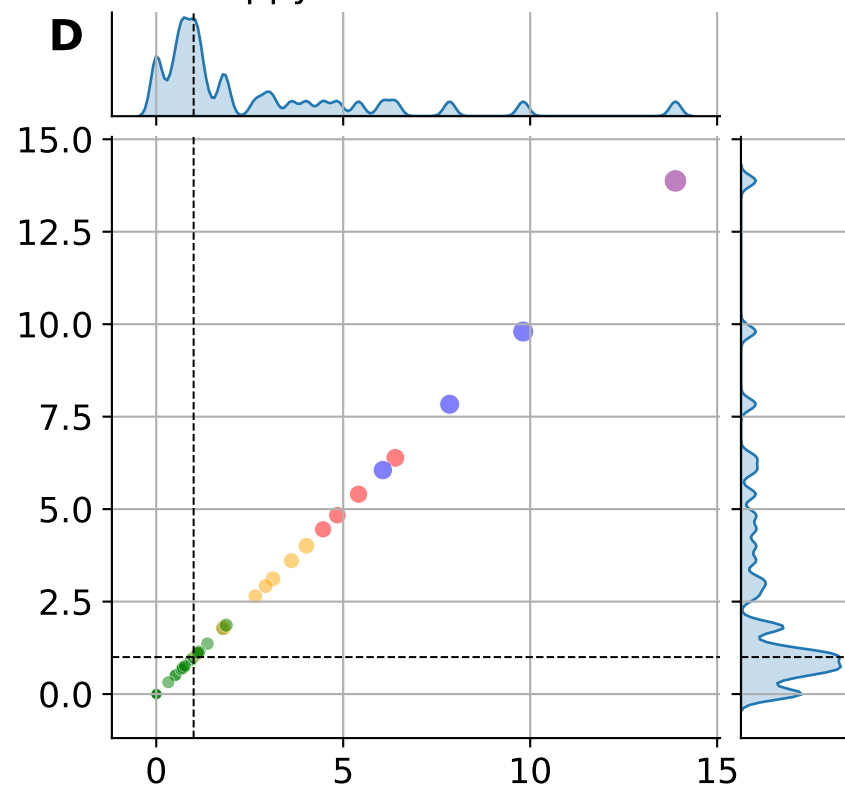

Mappy-rs with Gridion

**E**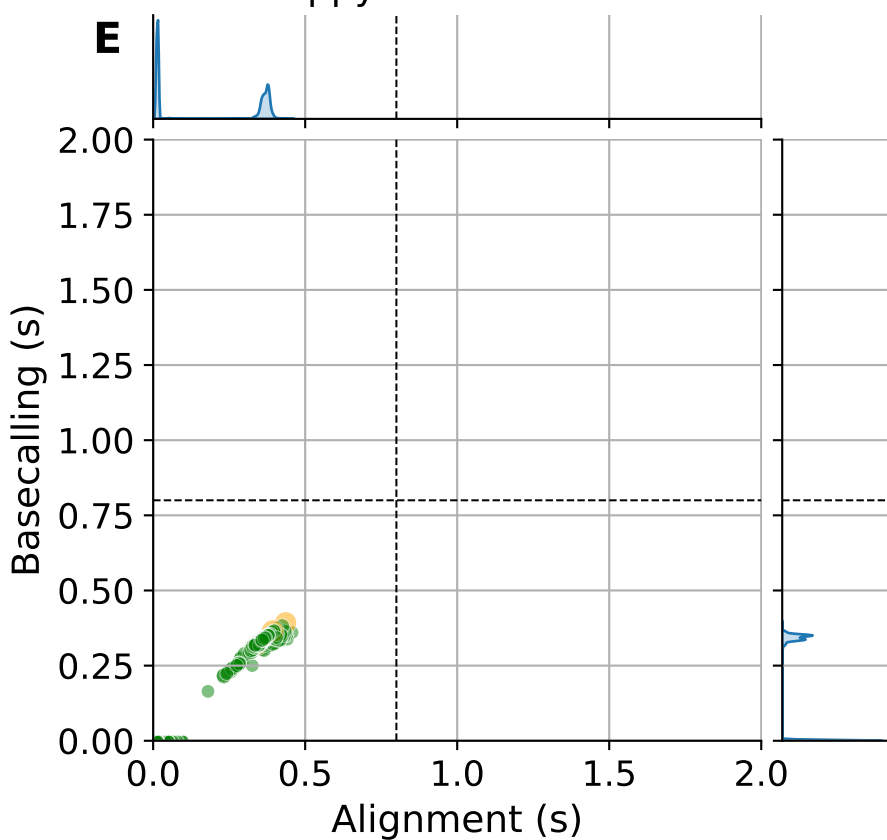

Mappy-rs with PromethION

**F**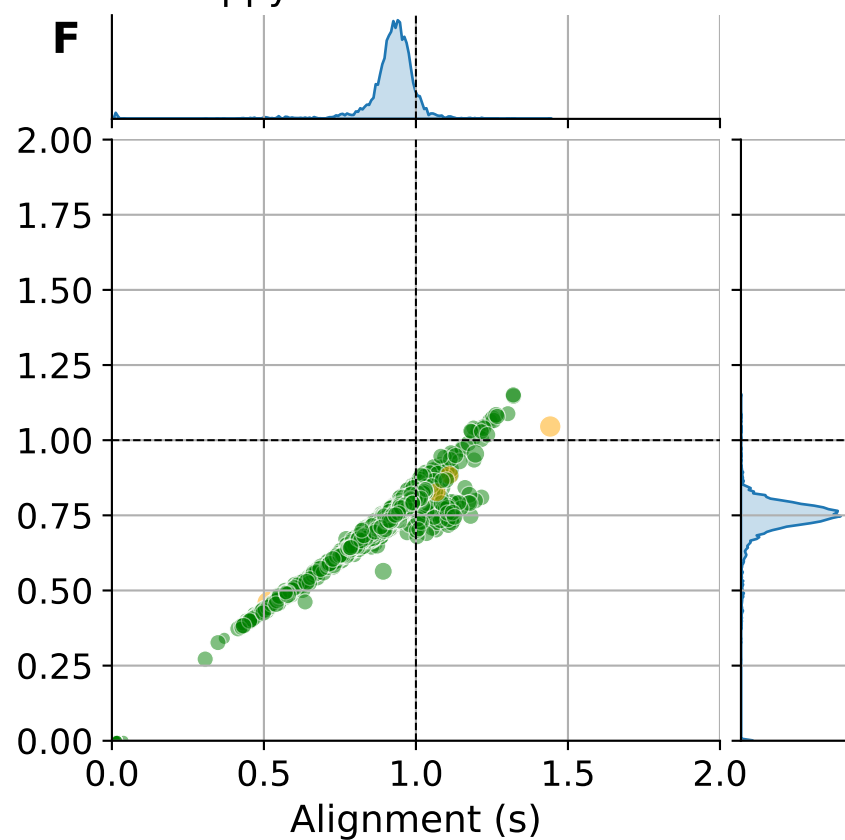

Supplement: Supplemental_Code.zip [file figure_5.pdf › barcode_paper_nb-GenomeResearch/figure_5/figure_5.pdf]
