# Supplementary figures and images for: Enhancing nanopore adaptive sampling for PromethION using readfish at scale
Source: HighWire-hosted journal article supplement (doi:10.1101/gr.279329.124), 2025-01-30

A

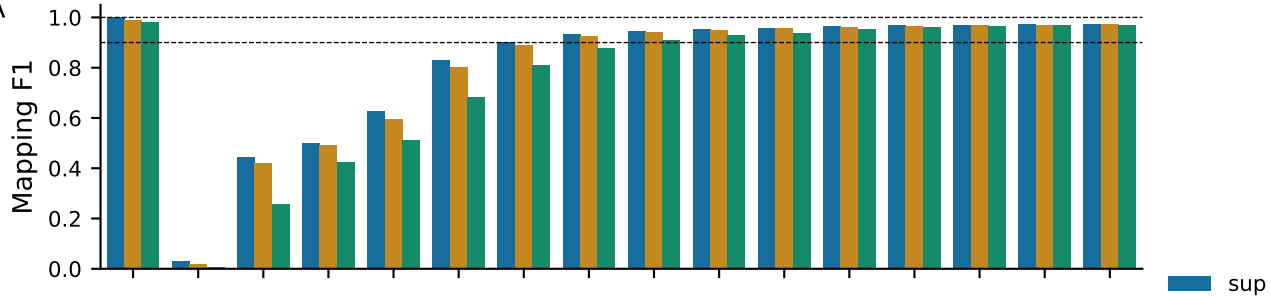

B

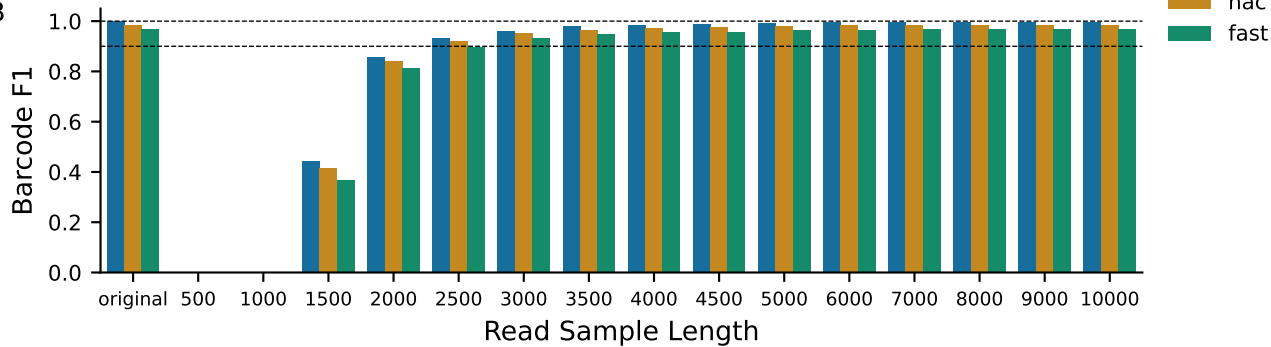

Supplement: Supplemental_Code.zip [file figure_1.pdf › barcode_paper_nb-GenomeResearch/figure_1/figure_1.pdf]

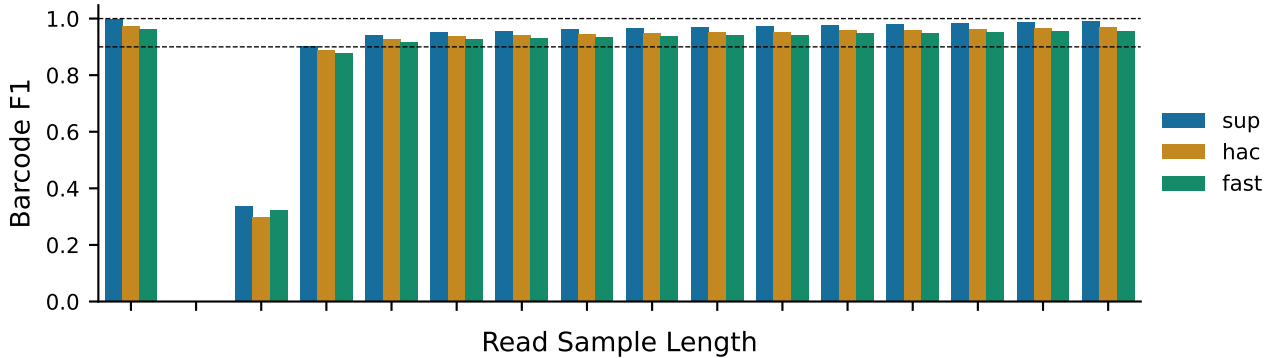

Supplement: Supplemental_Code.zip [file figure_1_barcode_only.pdf › barcode_paper_nb-GenomeResearch/figure_1/figure_1_barcode_only.pdf]

A

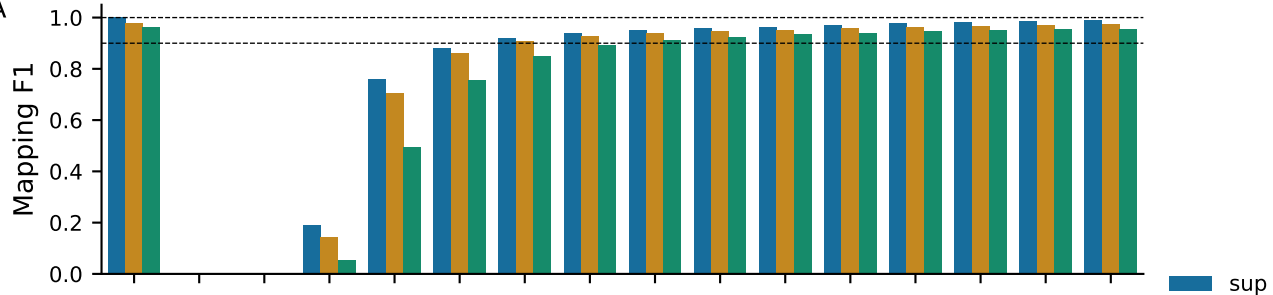

B

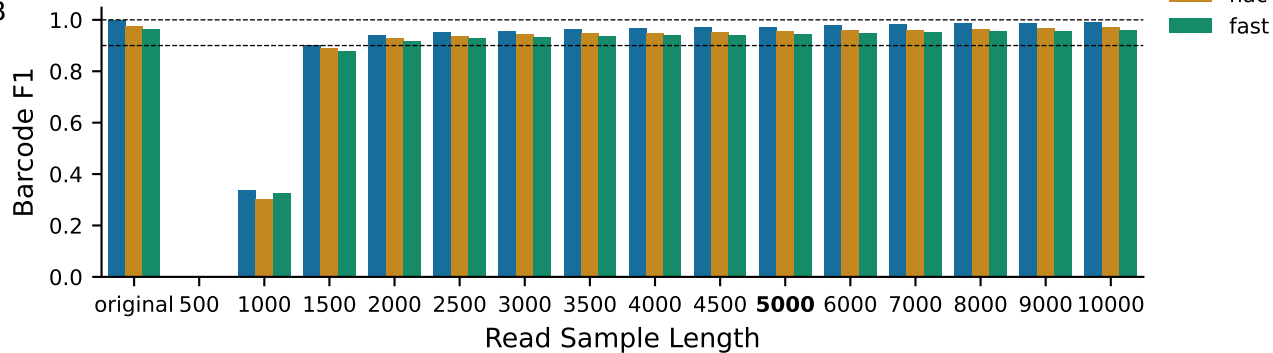

Supplement: Supplemental_Code.zip [file figure_2.pdf › barcode_paper_nb-GenomeResearch/figure_1/figure_2.pdf]

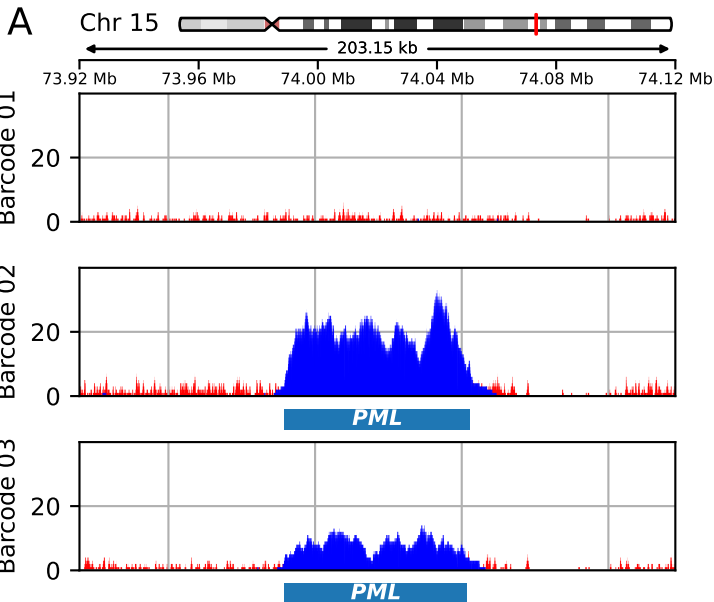

Supplement: Supplemental_Code.zip [file A_PML.pdf › barcode_paper_nb-GenomeResearch/figure_2/A_PML.pdf]

**B**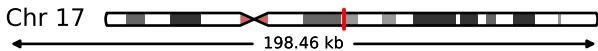

40.23 Mb 40.27 Mb 40.31 Mb 40.35 Mb 40.39 Mb 40.43 Mb

Barcode 01

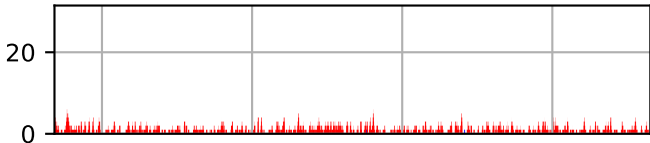

Barcode 02

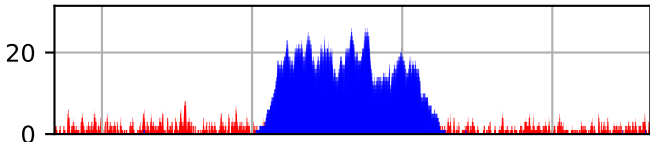

***RARA***

Barcode 03

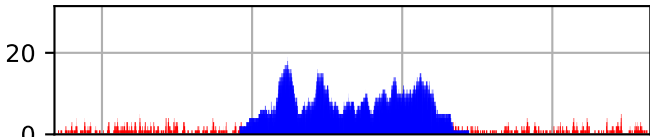

***RARA***

Supplement: Supplemental_Code.zip [file B_RARA.pdf › barcode_paper_nb-GenomeResearch/figure_2/B_RARA.pdf]

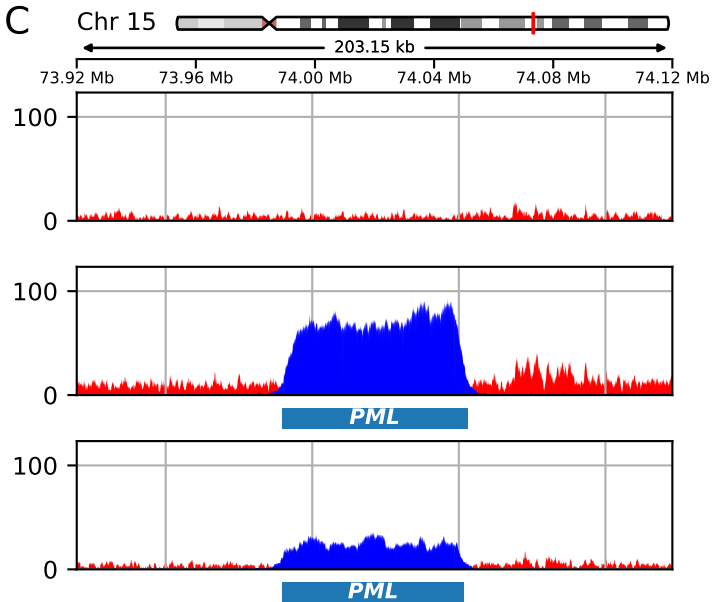

Supplement: Supplemental_Code.zip [file C_PML.pdf › barcode_paper_nb-GenomeResearch/figure_2/C_PML.pdf]

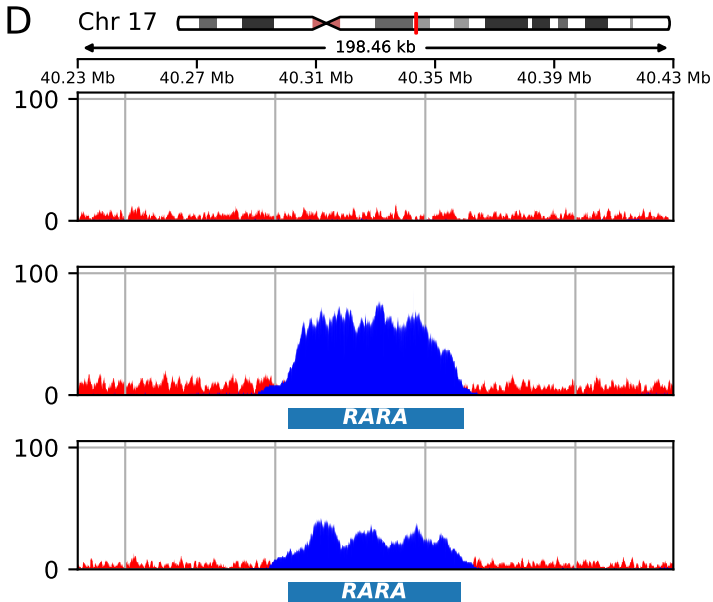

Supplement: Supplemental_Code.zip [file D_RARA.pdf › barcode_paper_nb-GenomeResearch/figure_2/D_RARA.pdf]

B

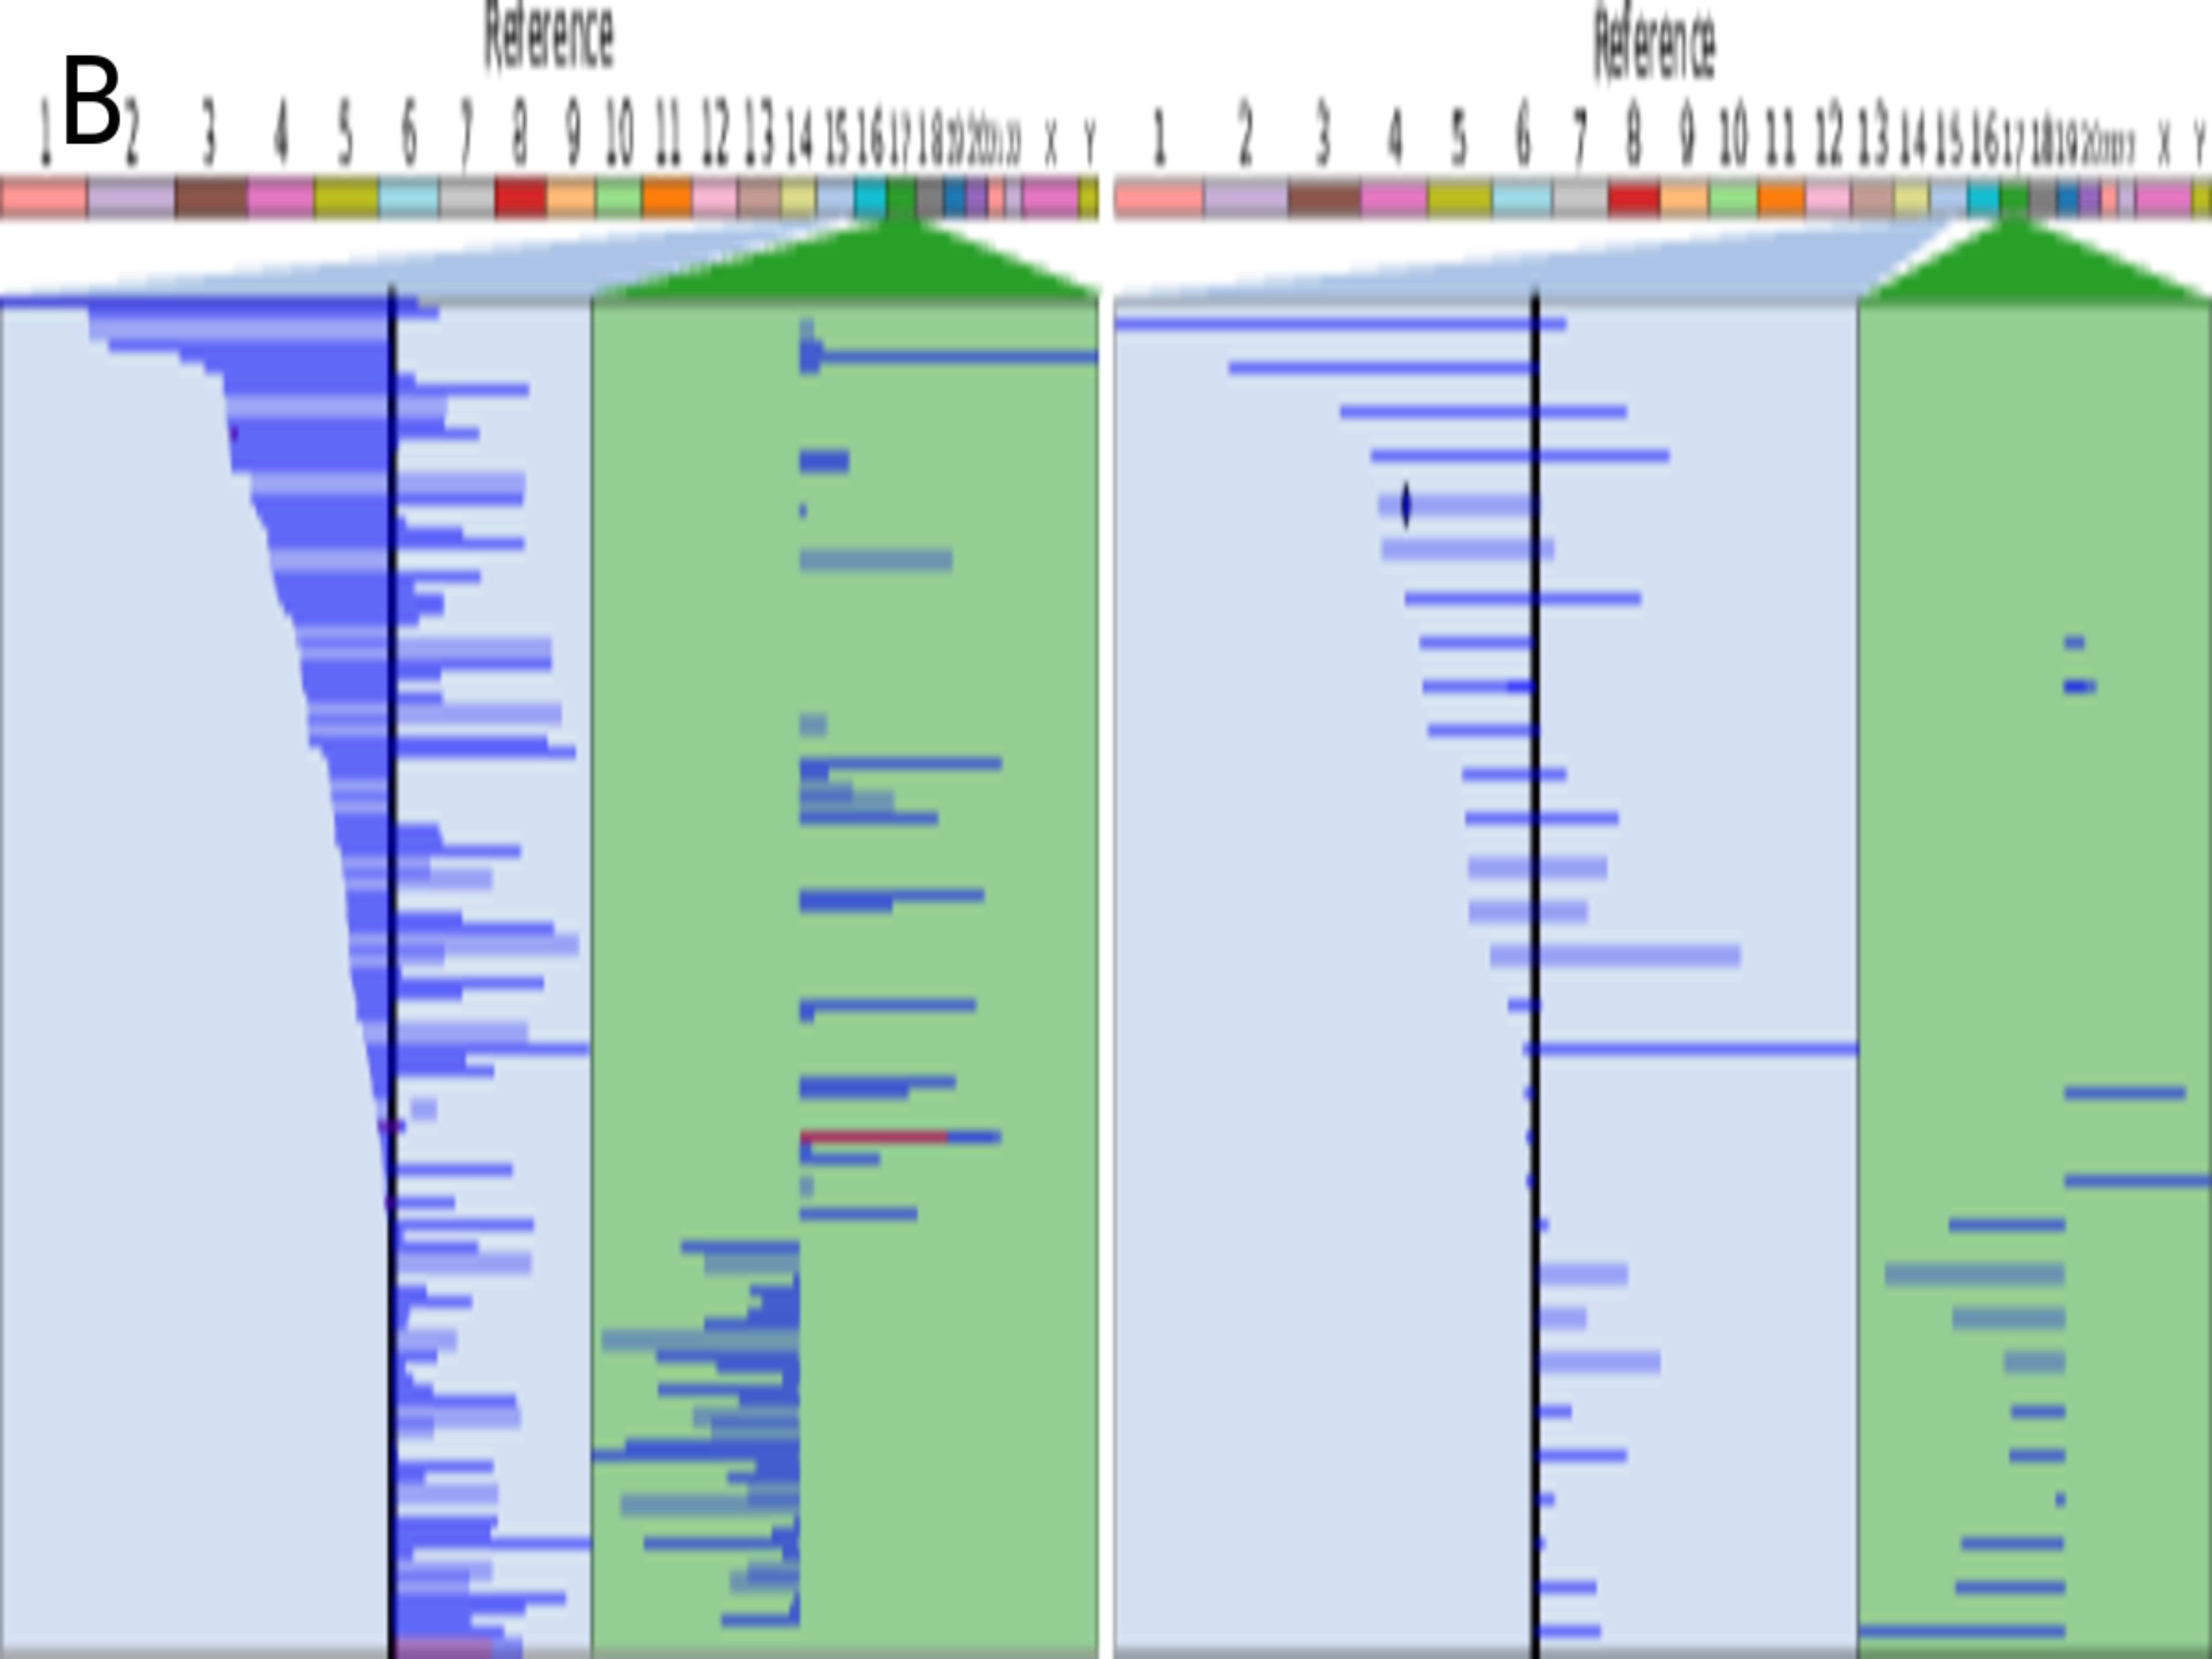

Supplement: Supplemental_Code.zip [file Barcode02_chr17_chr15_fusion.ribbon.labelled.pdf › barcode_paper_nb-GenomeResearch/figure_3_supp_figure_3/Barcode02_chr17_chr15_fusion.ribbon.labelled.pdf]

C

Reference

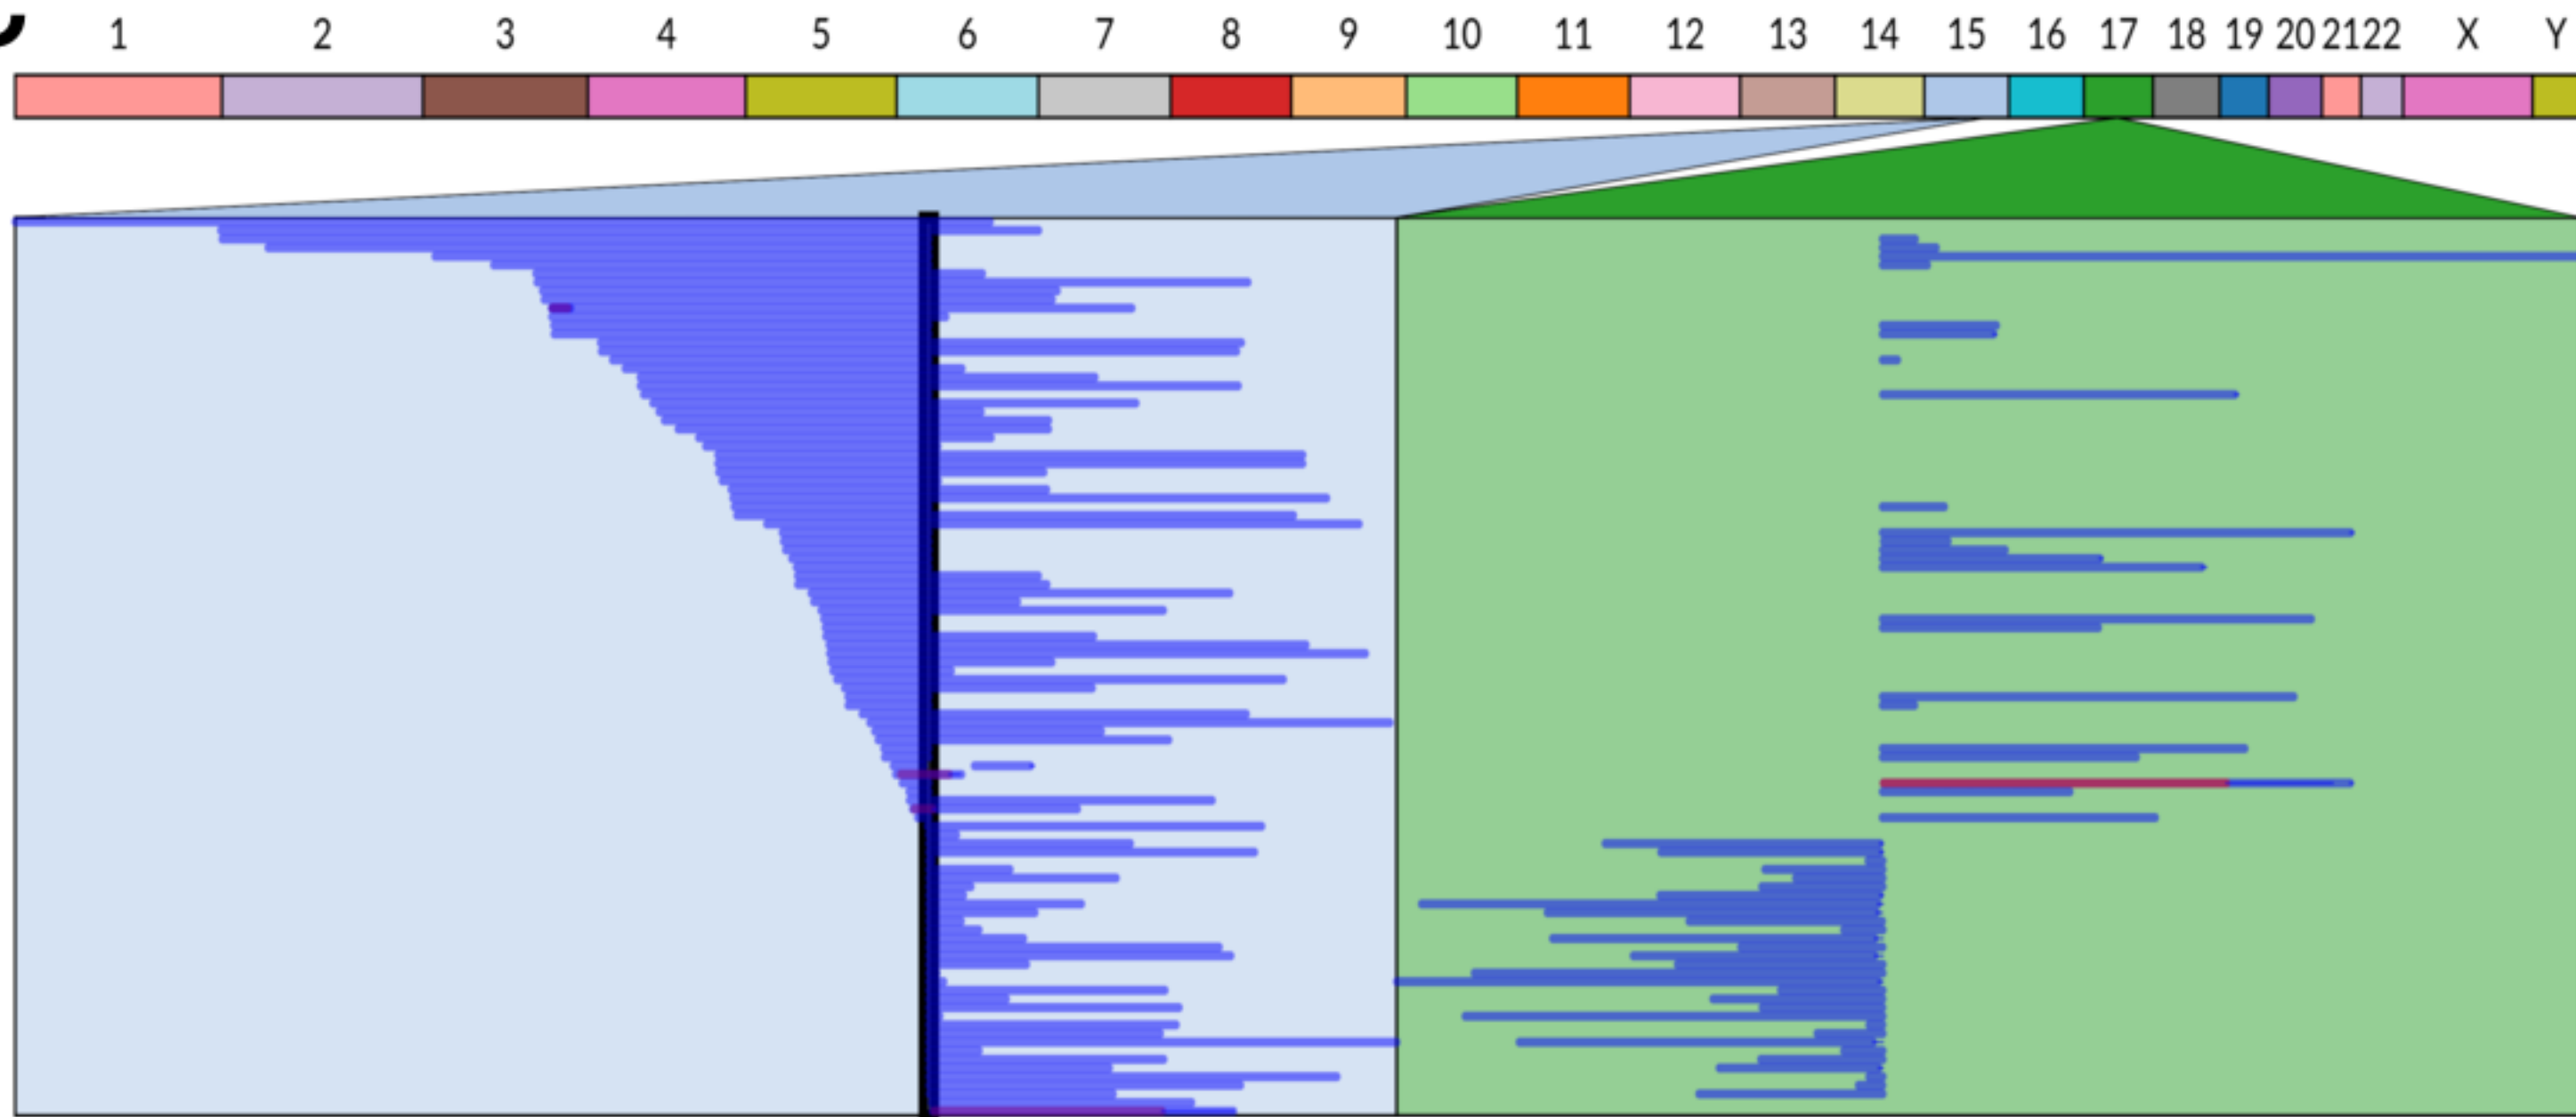

Supplement: Supplemental_Code.zip [file Barcode06_chr17_chr15_fusion.ribbon.labelled.pdf › barcode_paper_nb-GenomeResearch/figure_3_supp_figure_3/Barcode06_chr17_chr15_fusion.ribbon.labelled.pdf]

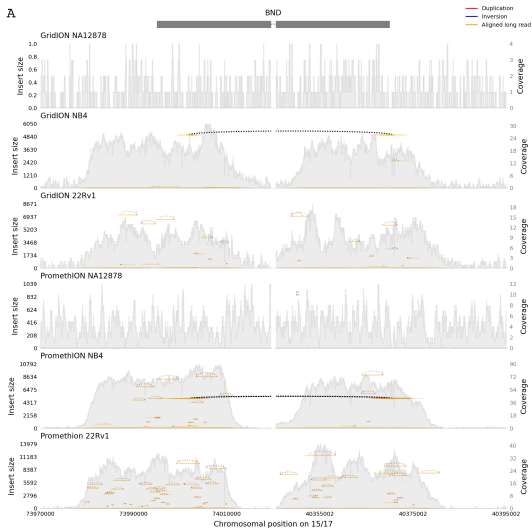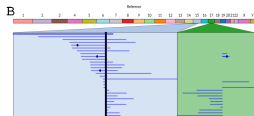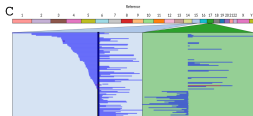

Supplement: Supplemental_Code.zip [file Supplemental_Fig_S3.pdf › barcode_paper_nb-GenomeResearch/figure_3_supp_figure_3/Supplemental_Fig_S3.pdf]

**B**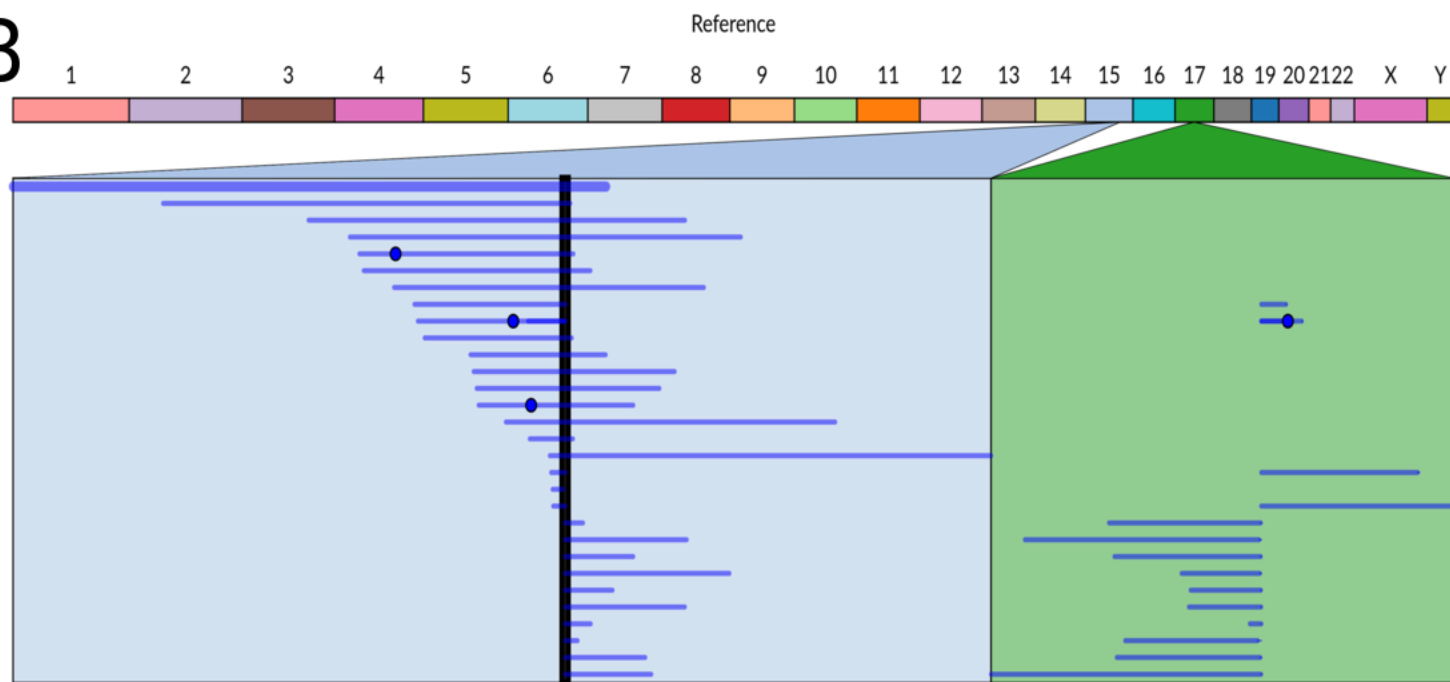**C**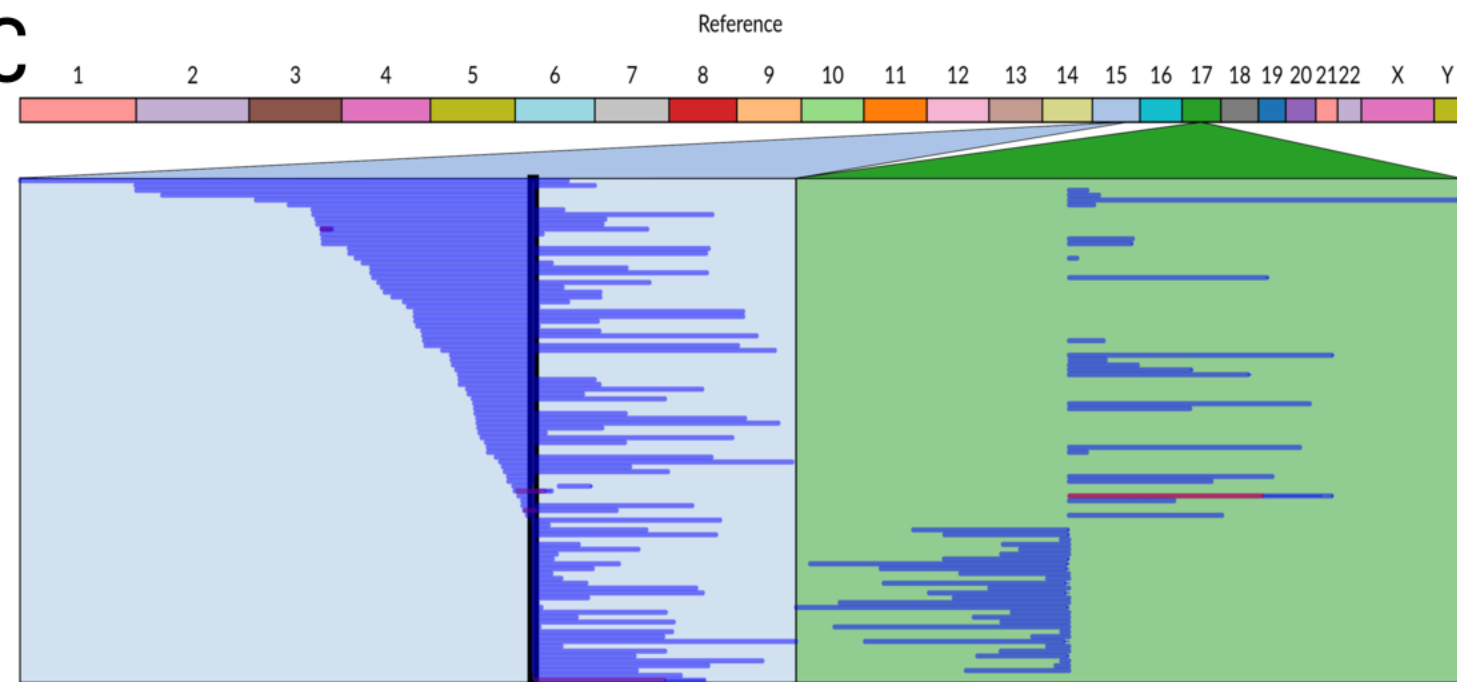

Supplement: Supplemental_Code.zip [file bottom_row.pdf › barcode_paper_nb-GenomeResearch/figure_3_supp_figure_3/bottom_row.pdf]

**A**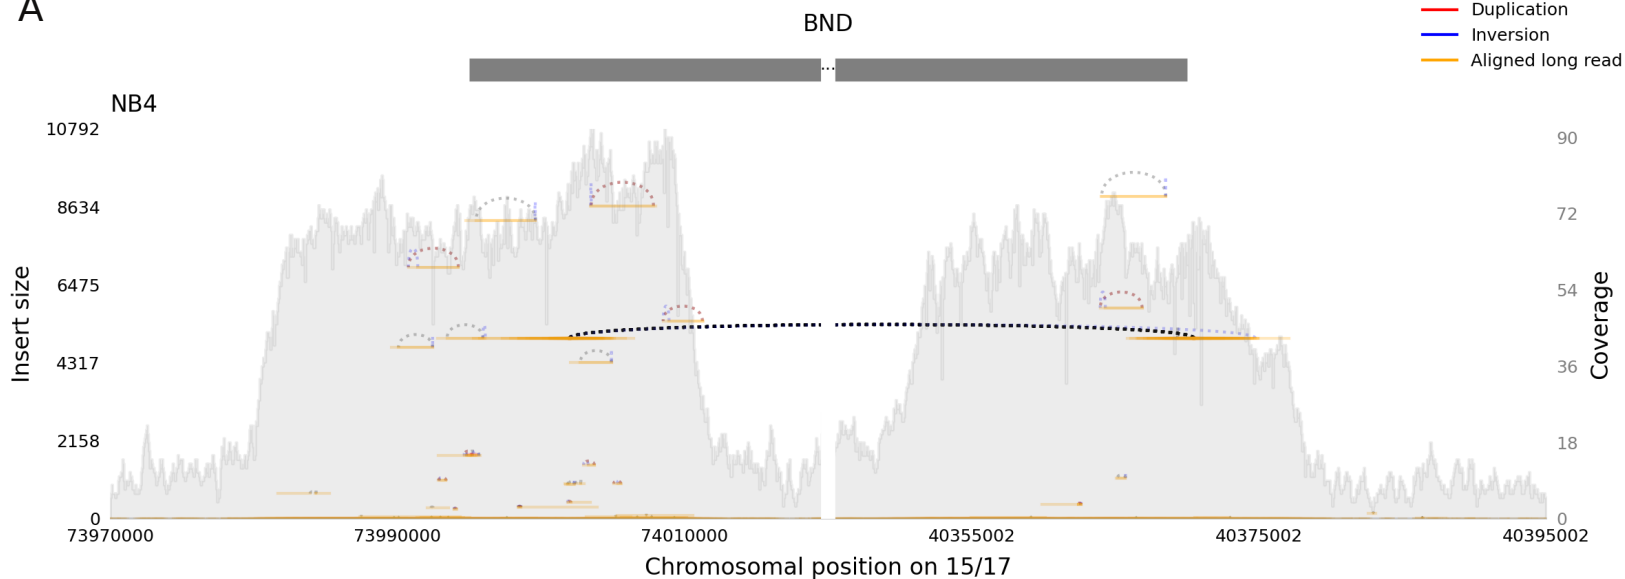**B**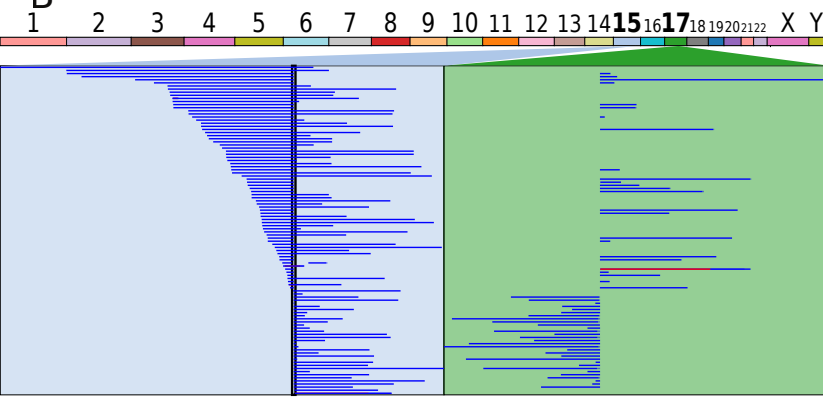**C**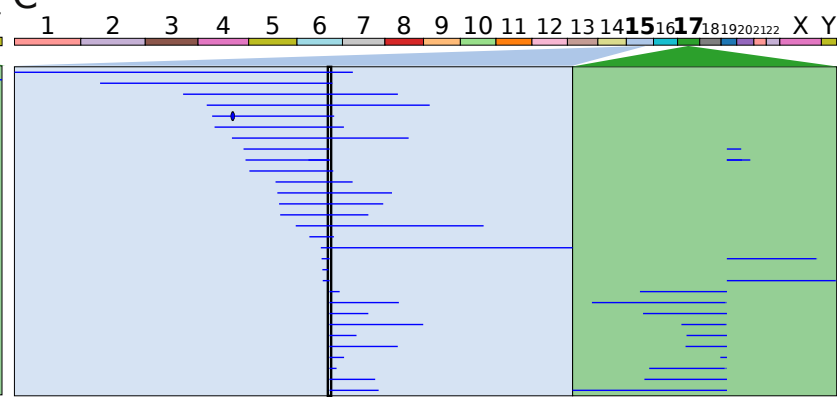

Supplement: Supplemental_Code.zip [file barcode06.pdf › barcode_paper_nb-GenomeResearch/figure_3_supp_figure_3/cuteSVoutput/barcode06.pdf]

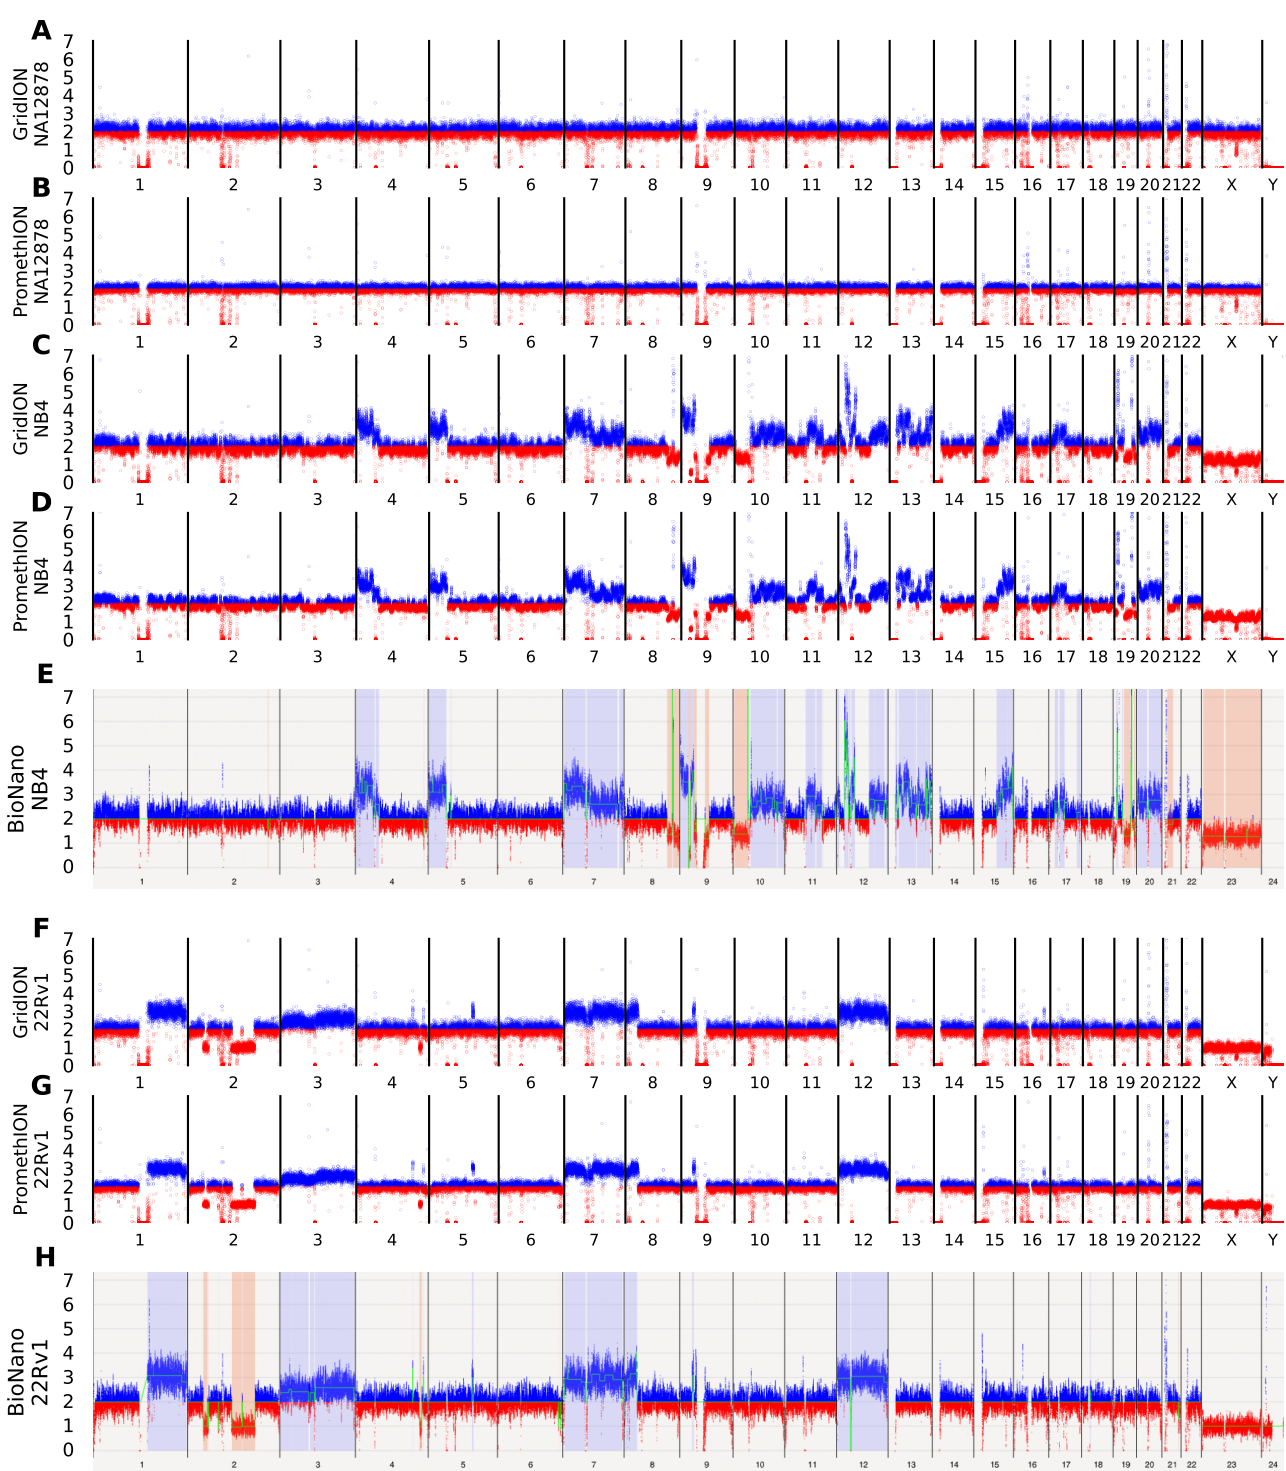

Supplement: Supplemental_Code.zip [file Supplemental_Fig_S4.pdf › barcode_paper_nb-GenomeResearch/figure_4_supp_figure_4/Supplemental_Fig_S4.pdf]



Supplement: Supplemental_Code.zip [file copy-number-bio-nano-grid-spec-bins.pdf › barcode_paper_nb-GenomeResearch/figure_4_supp_figure_4/copy-number-bio-nano-grid-spec-bins.pdf]

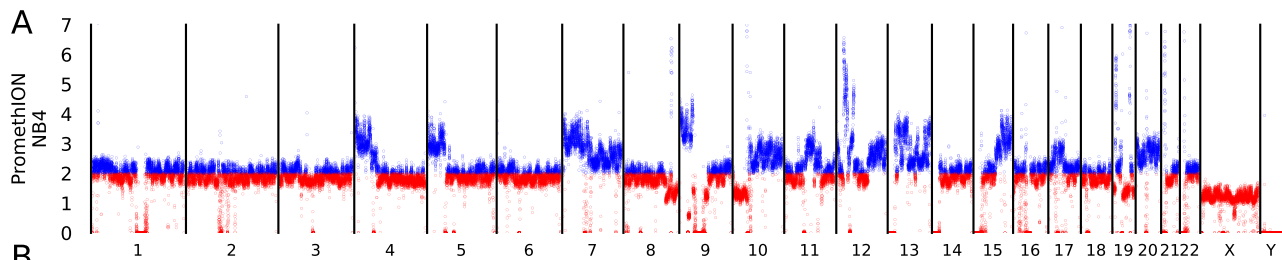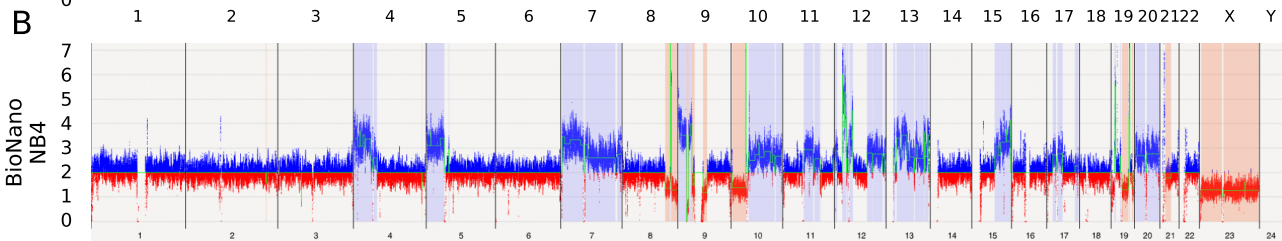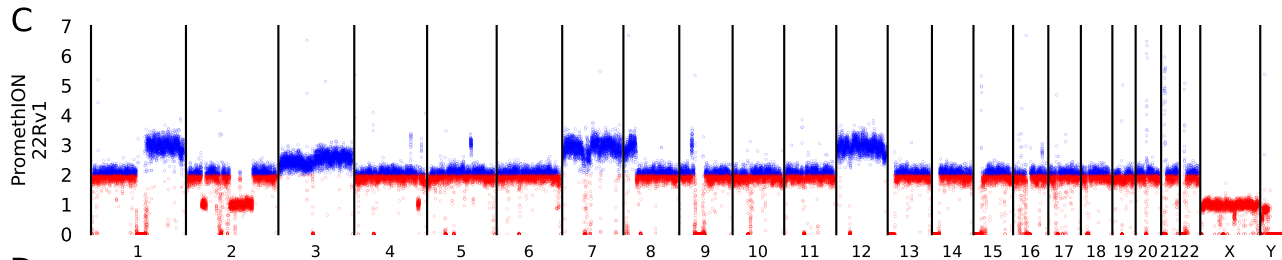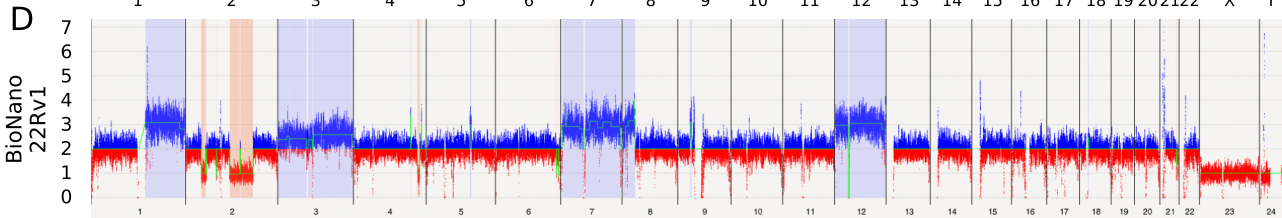

Supplement: Supplemental_Code.zip [file fig_s4_prom_only.pdf › barcode_paper_nb-GenomeResearch/figure_4_supp_figure_4/fig_s4_prom_only.pdf]

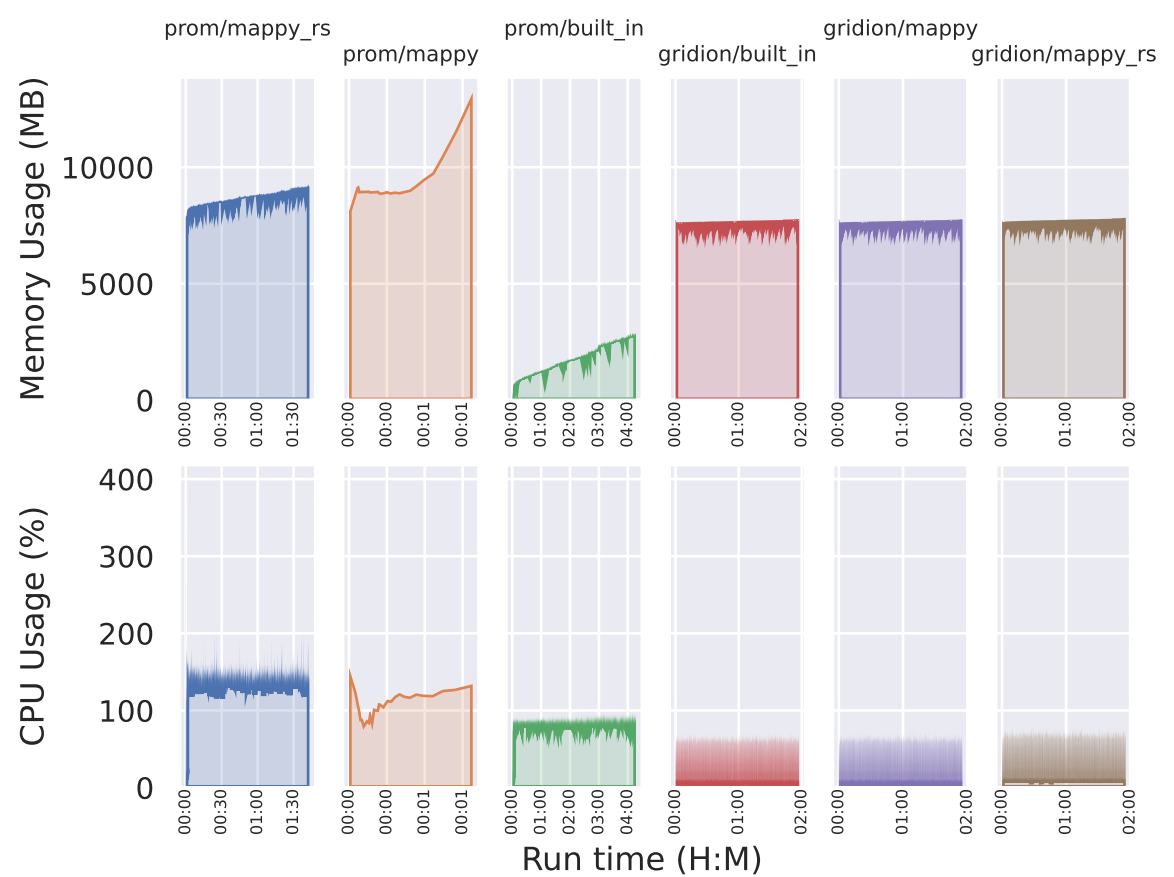

Supplement: Supplemental_Code.zip [file Supplemental_Fig_S6.pdf › barcode_paper_nb-GenomeResearch/figure_5/Supplemental_Fig_S6.pdf]

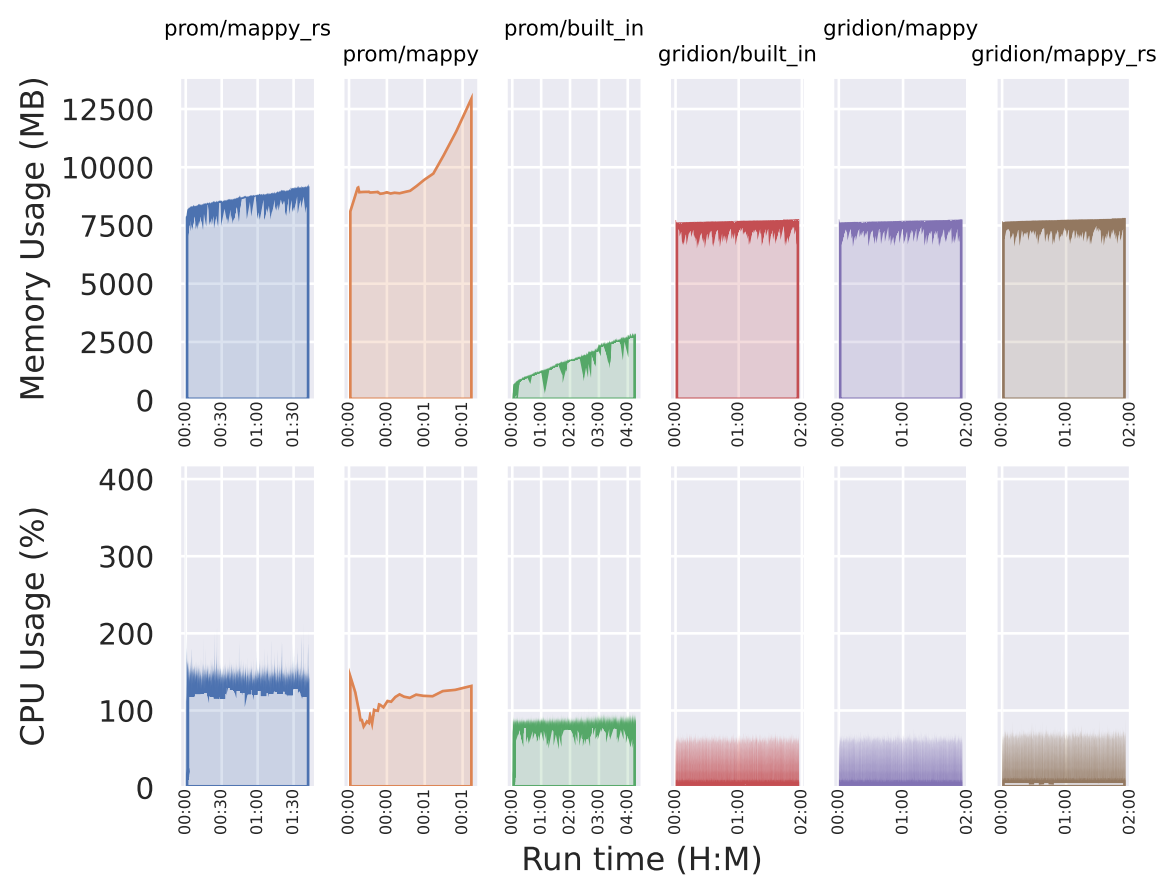

Supplement: Supplemental_Code.zip [file Supplementary_Figure_6.pdf › barcode_paper_nb-GenomeResearch/figure_5/Supplementary_Figure_6.pdf]

Batch Mean Read length

● 0 - 1000    ● 1001 - 2000    ● 2001 - 3000    ● 3001 - 4000    ● 4001 - 5000    ● > 5000

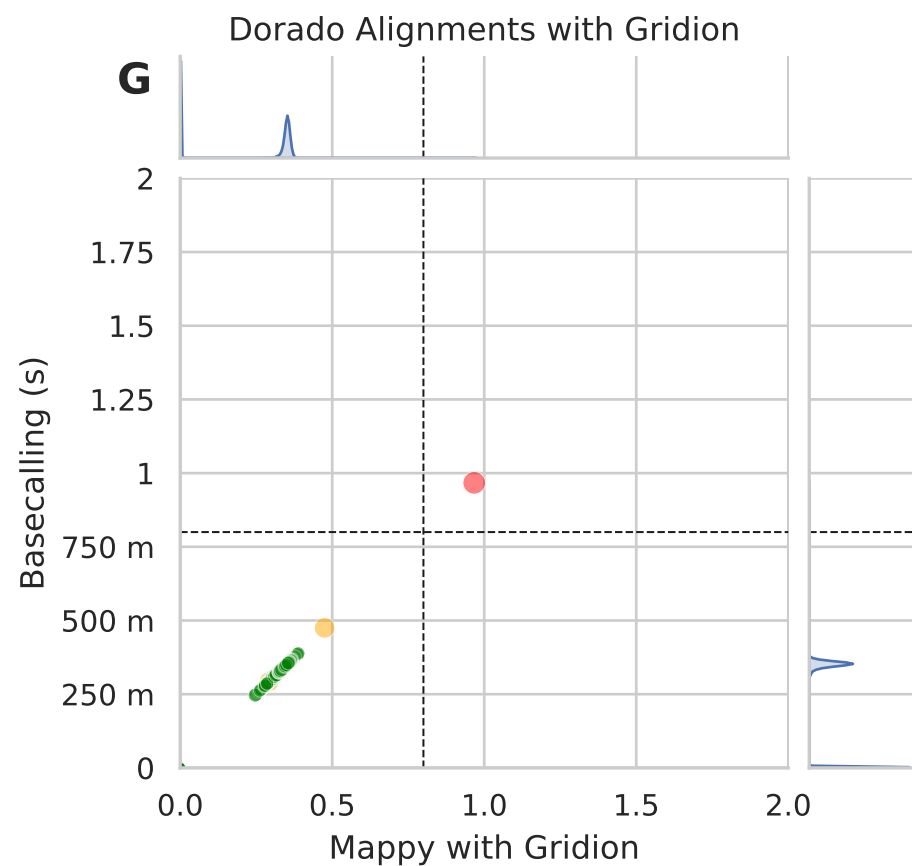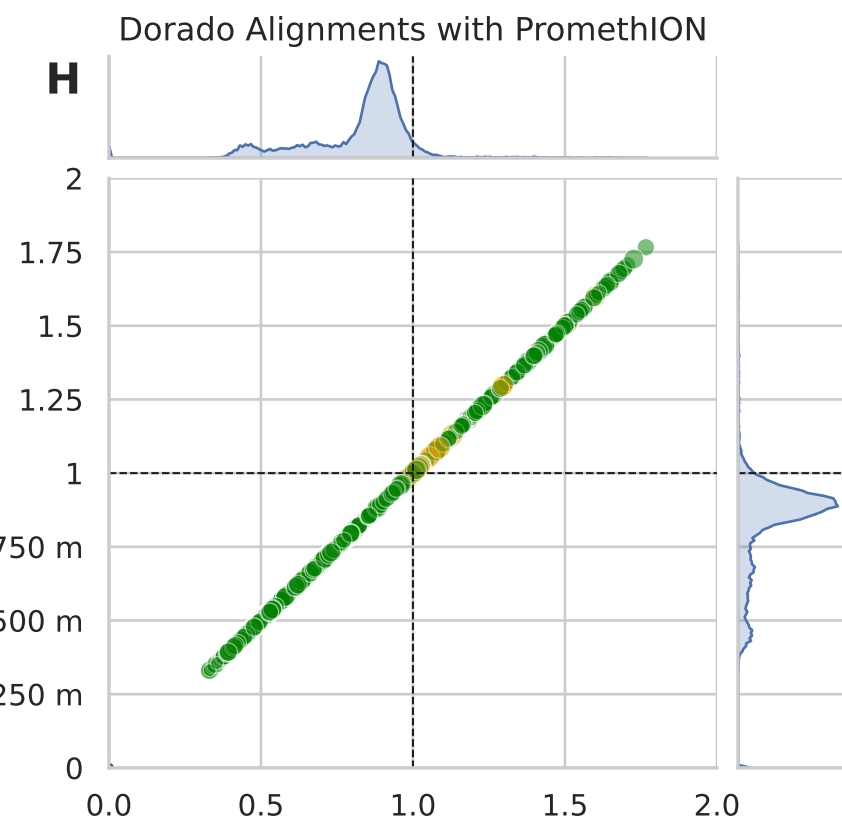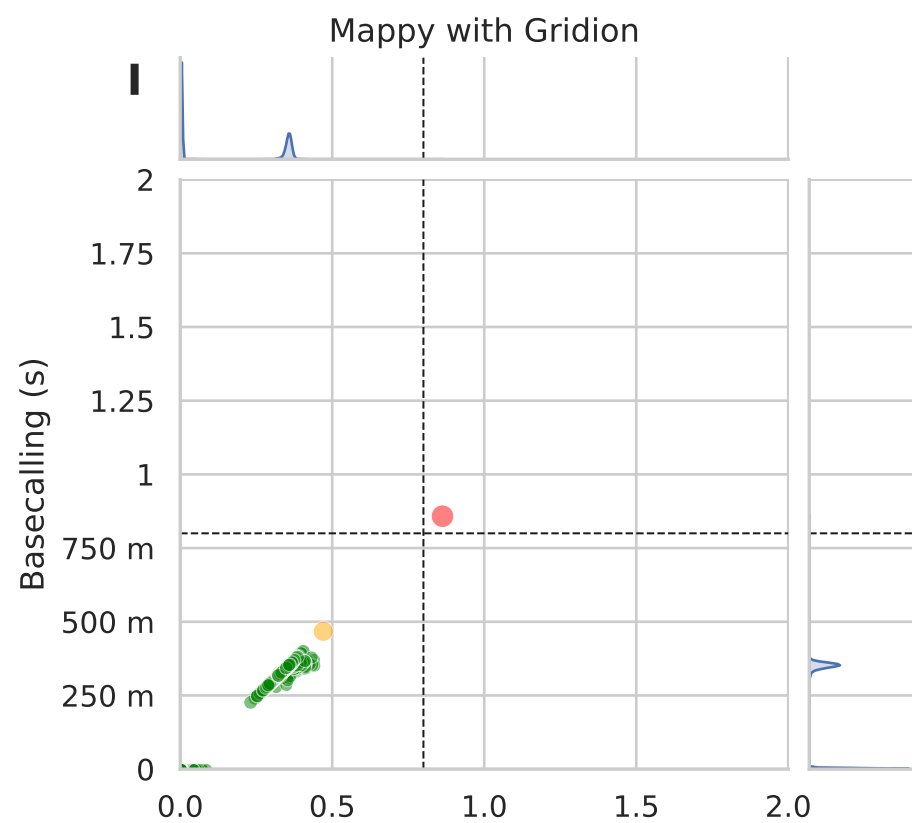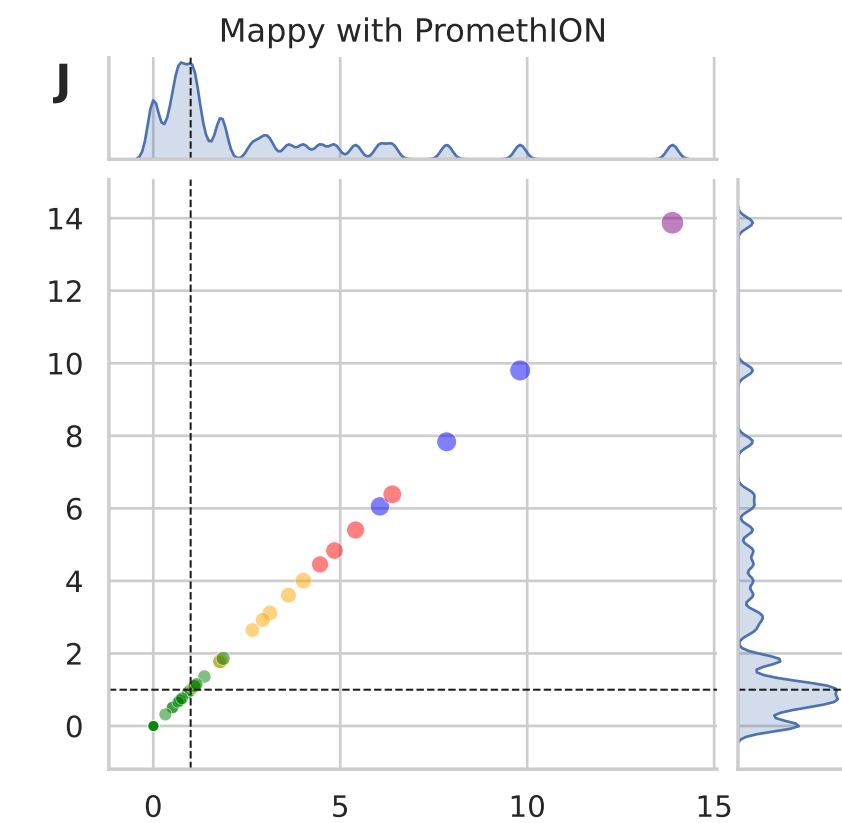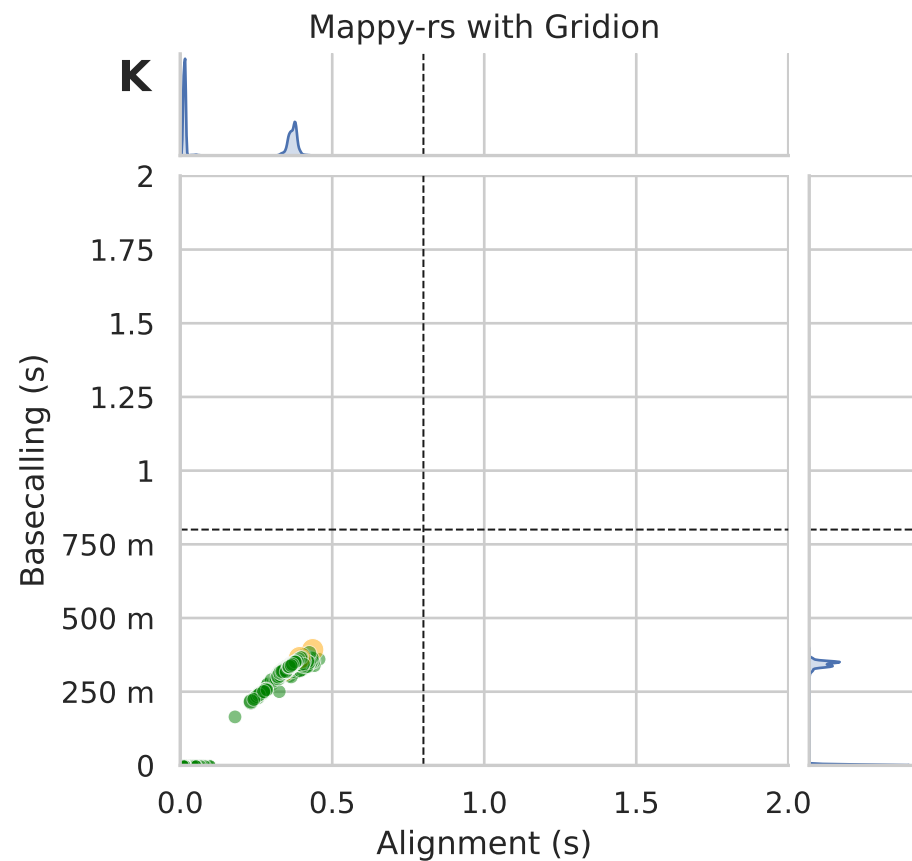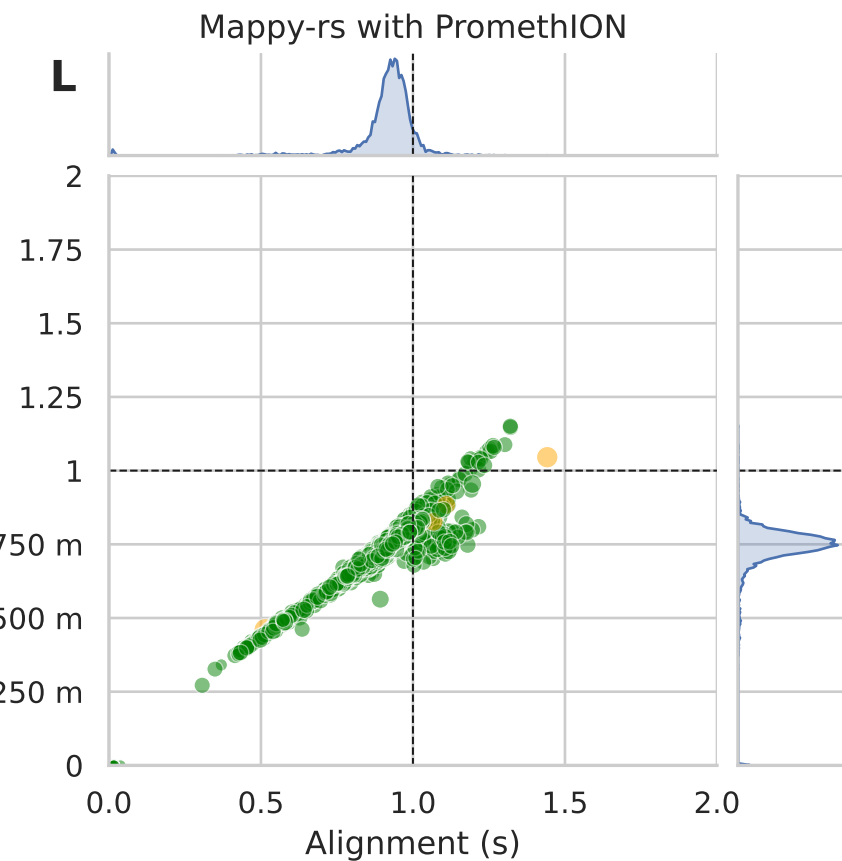

Supplement: Supplemental_Code.zip [file figure_1.pdf › barcode_paper_nb-GenomeResearch/figure_5/figure_1.pdf]

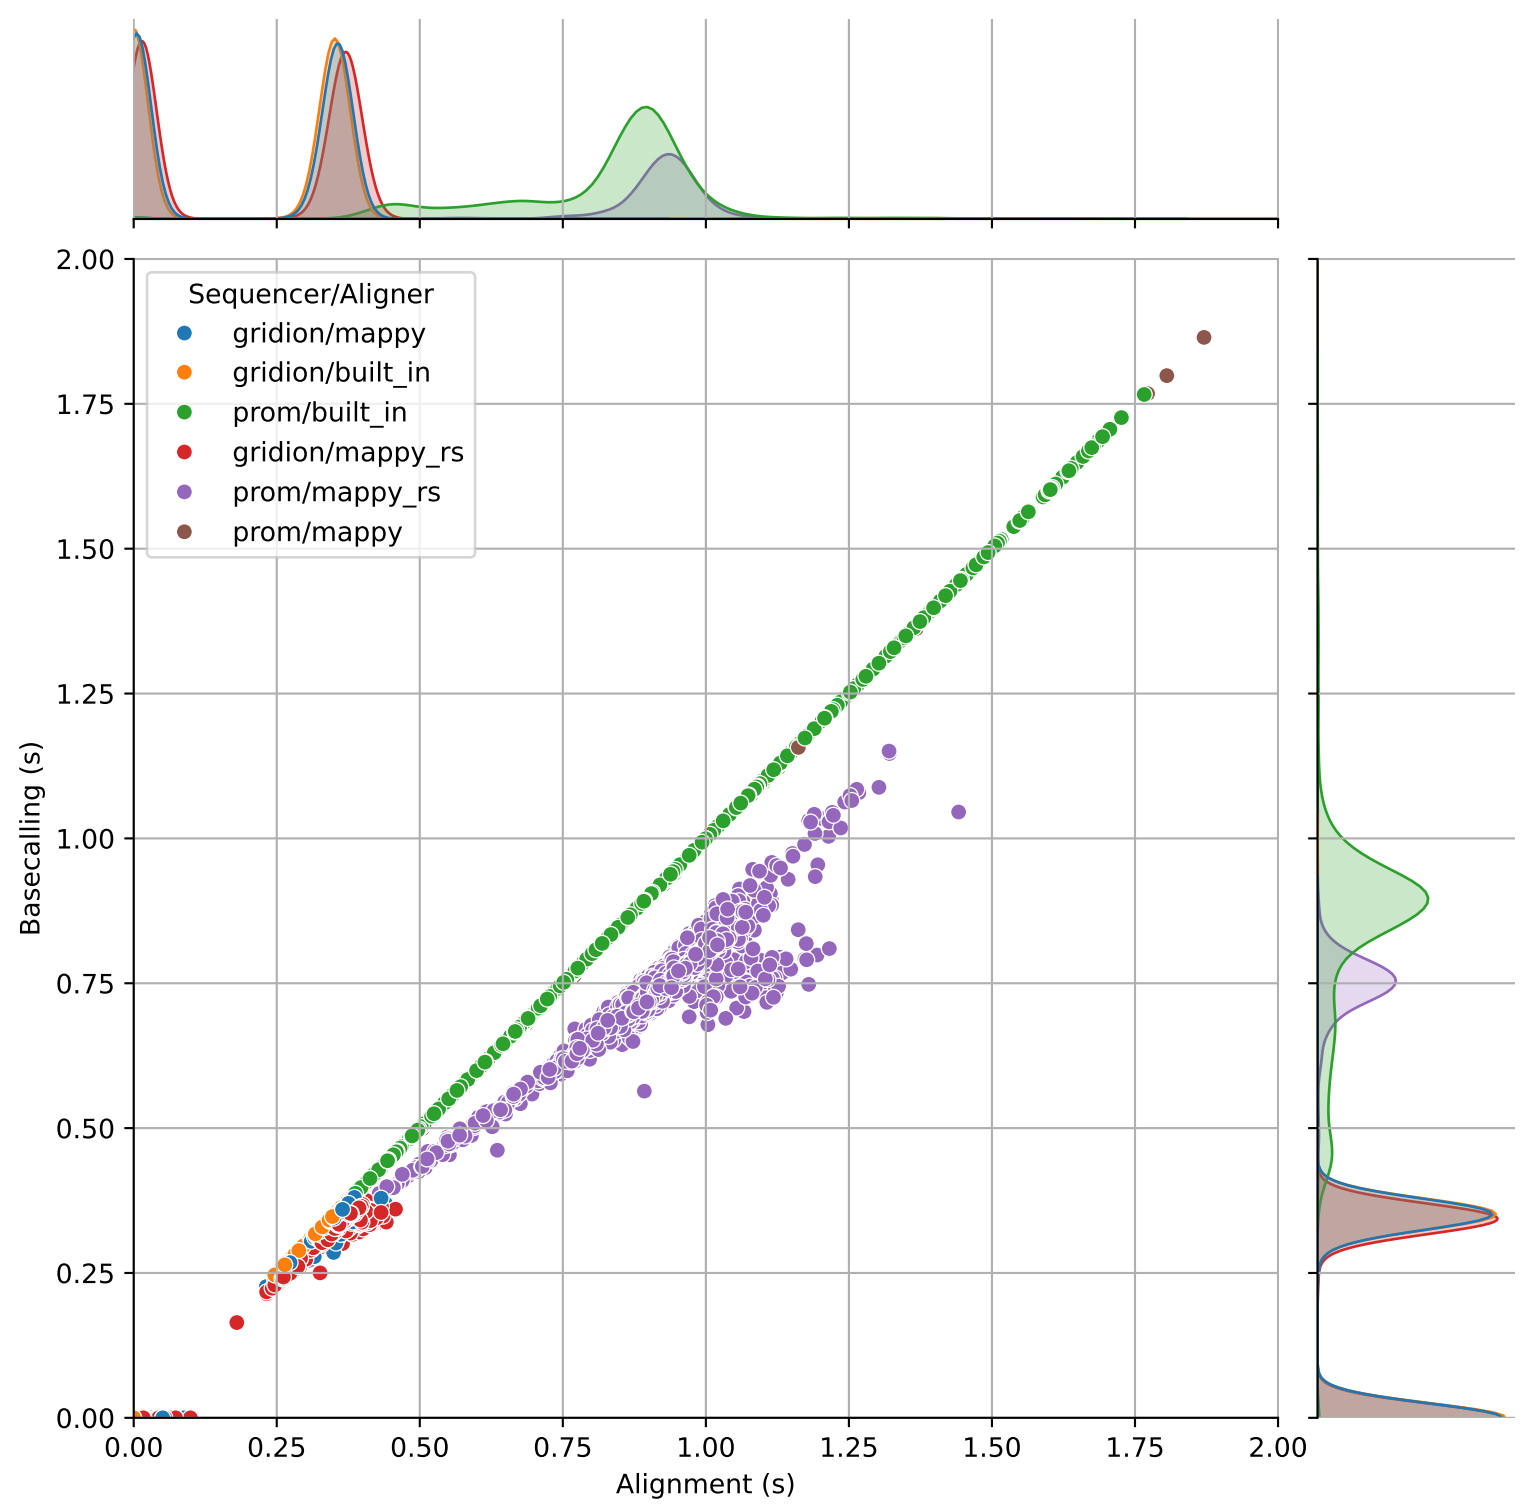

Supplement: Supplemental_Code.zip [file test.pdf › barcode_paper_nb-GenomeResearch/figure_5/test.pdf]

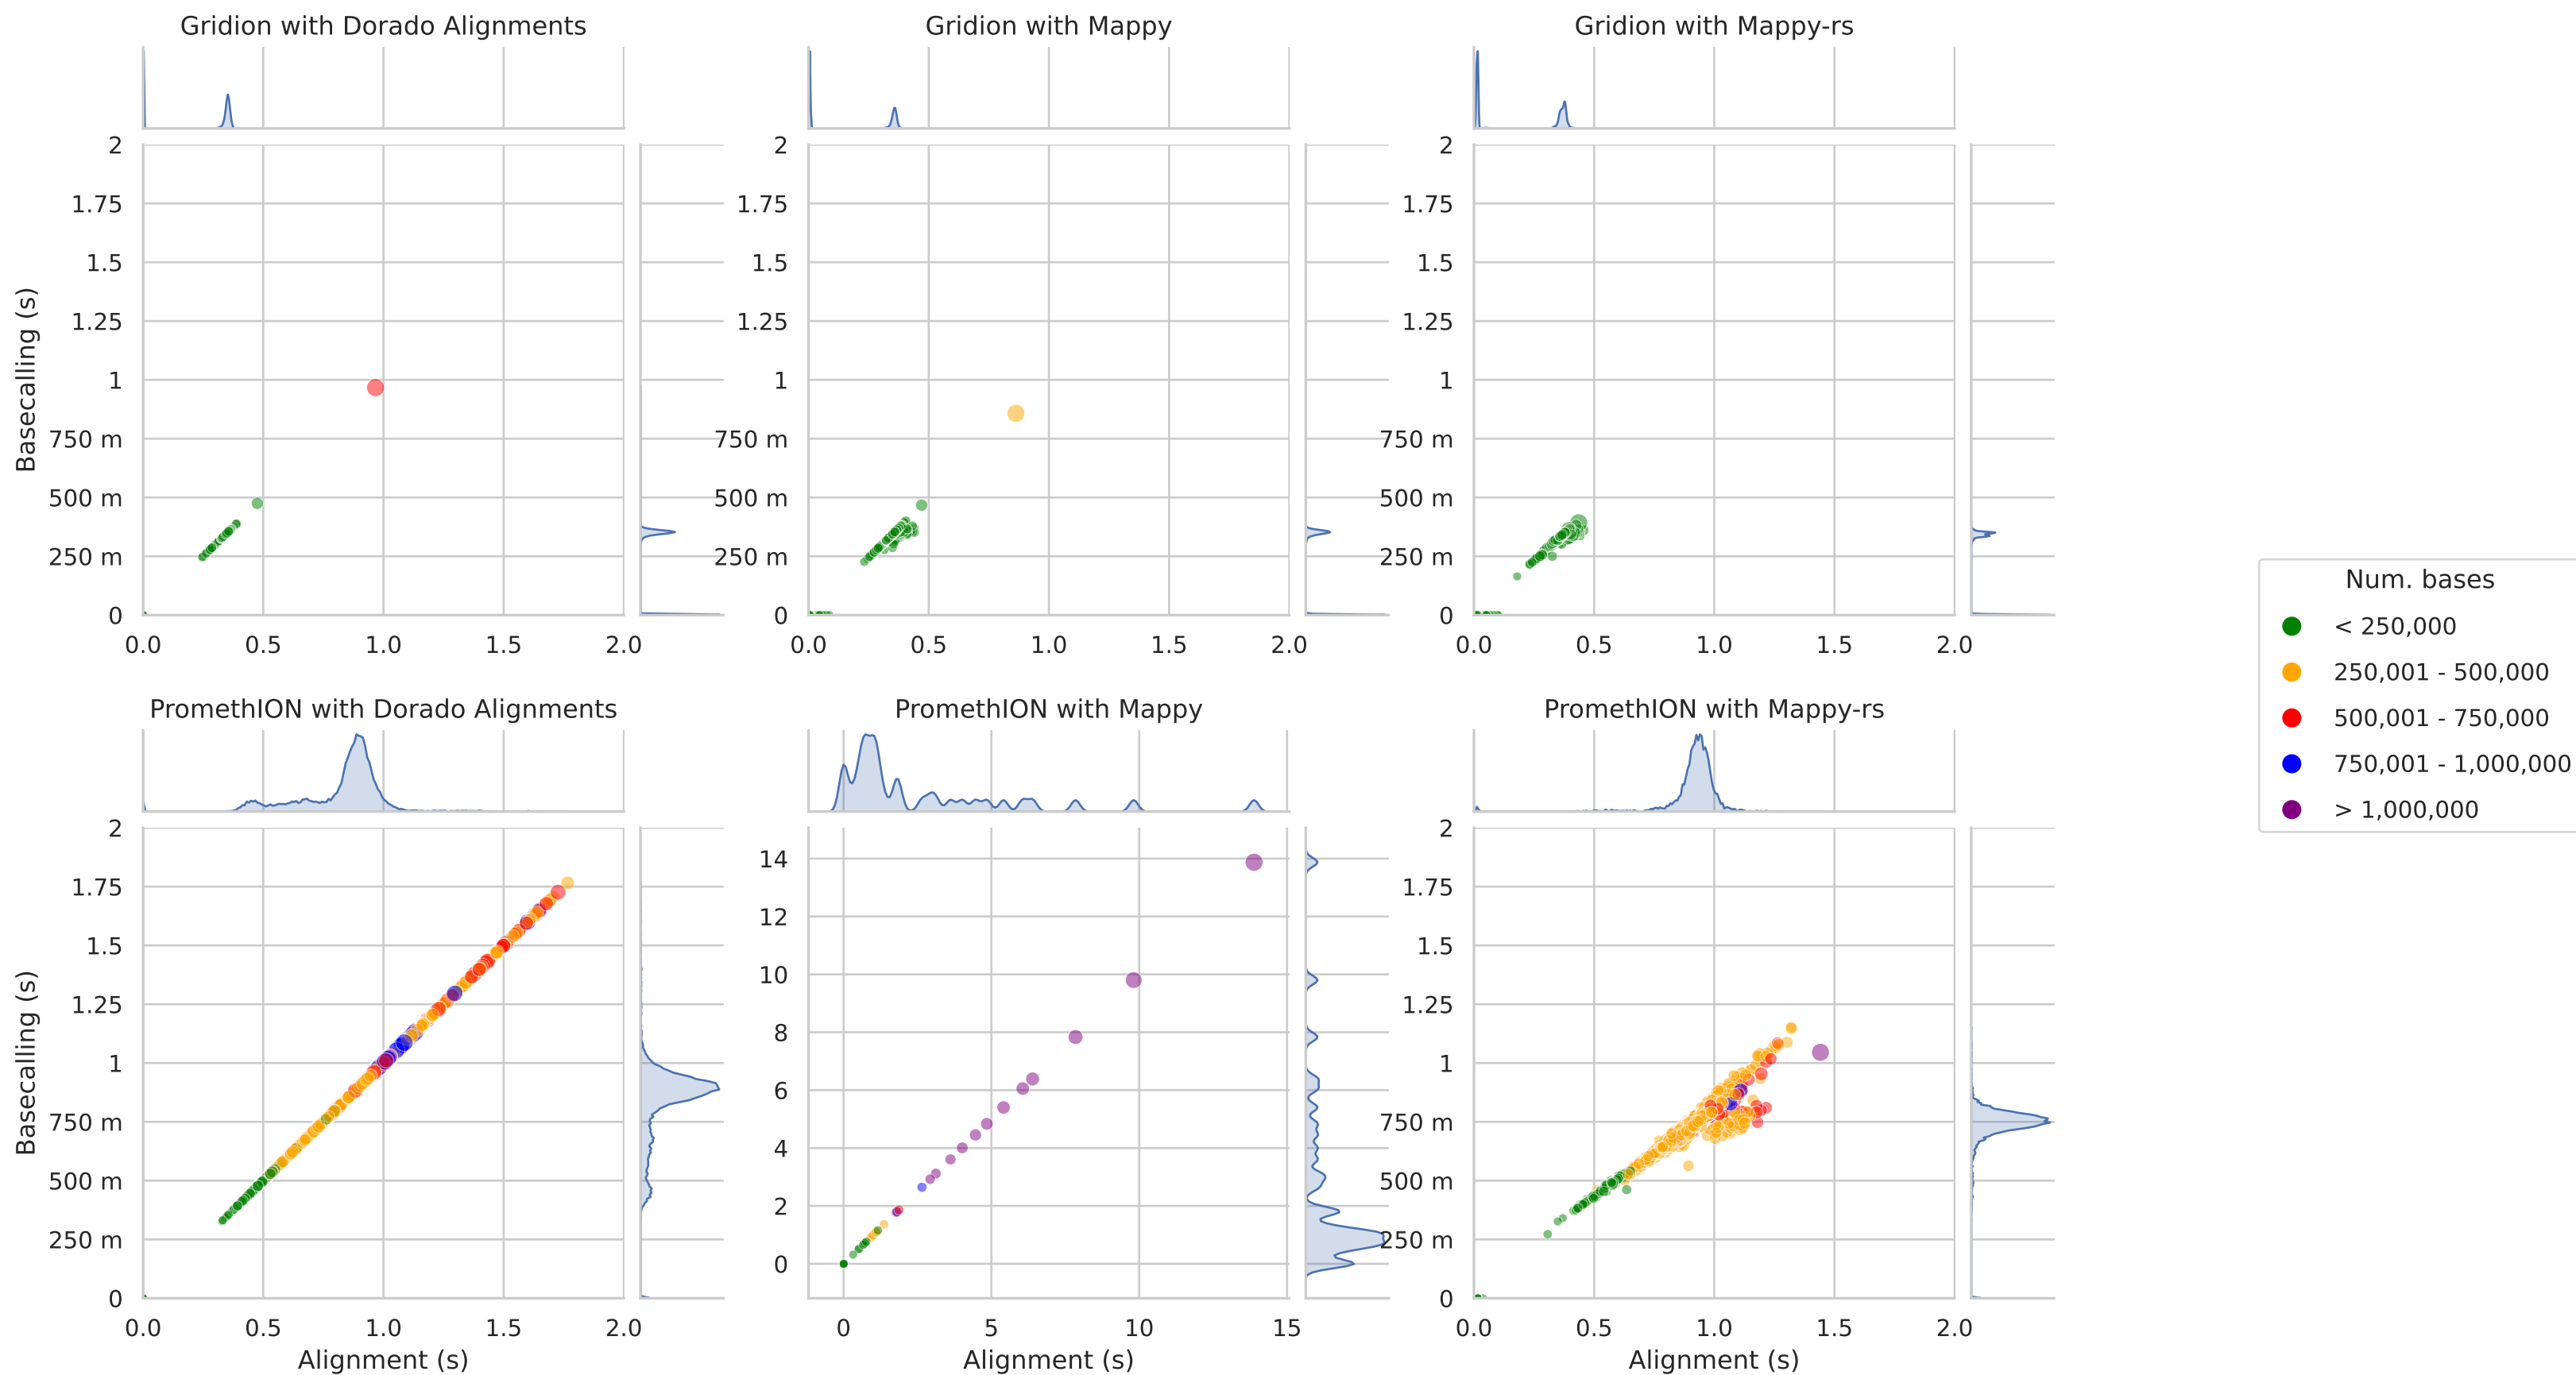

Supplement: Supplemental_Code.zip [file test_facetted.pdf › barcode_paper_nb-GenomeResearch/figure_5/test_facetted.pdf]

Batch Mean Read length

0 - 1000    1001 - 2000    2001 - 3000    3001 - 4000    4001 - 5000    > 5000

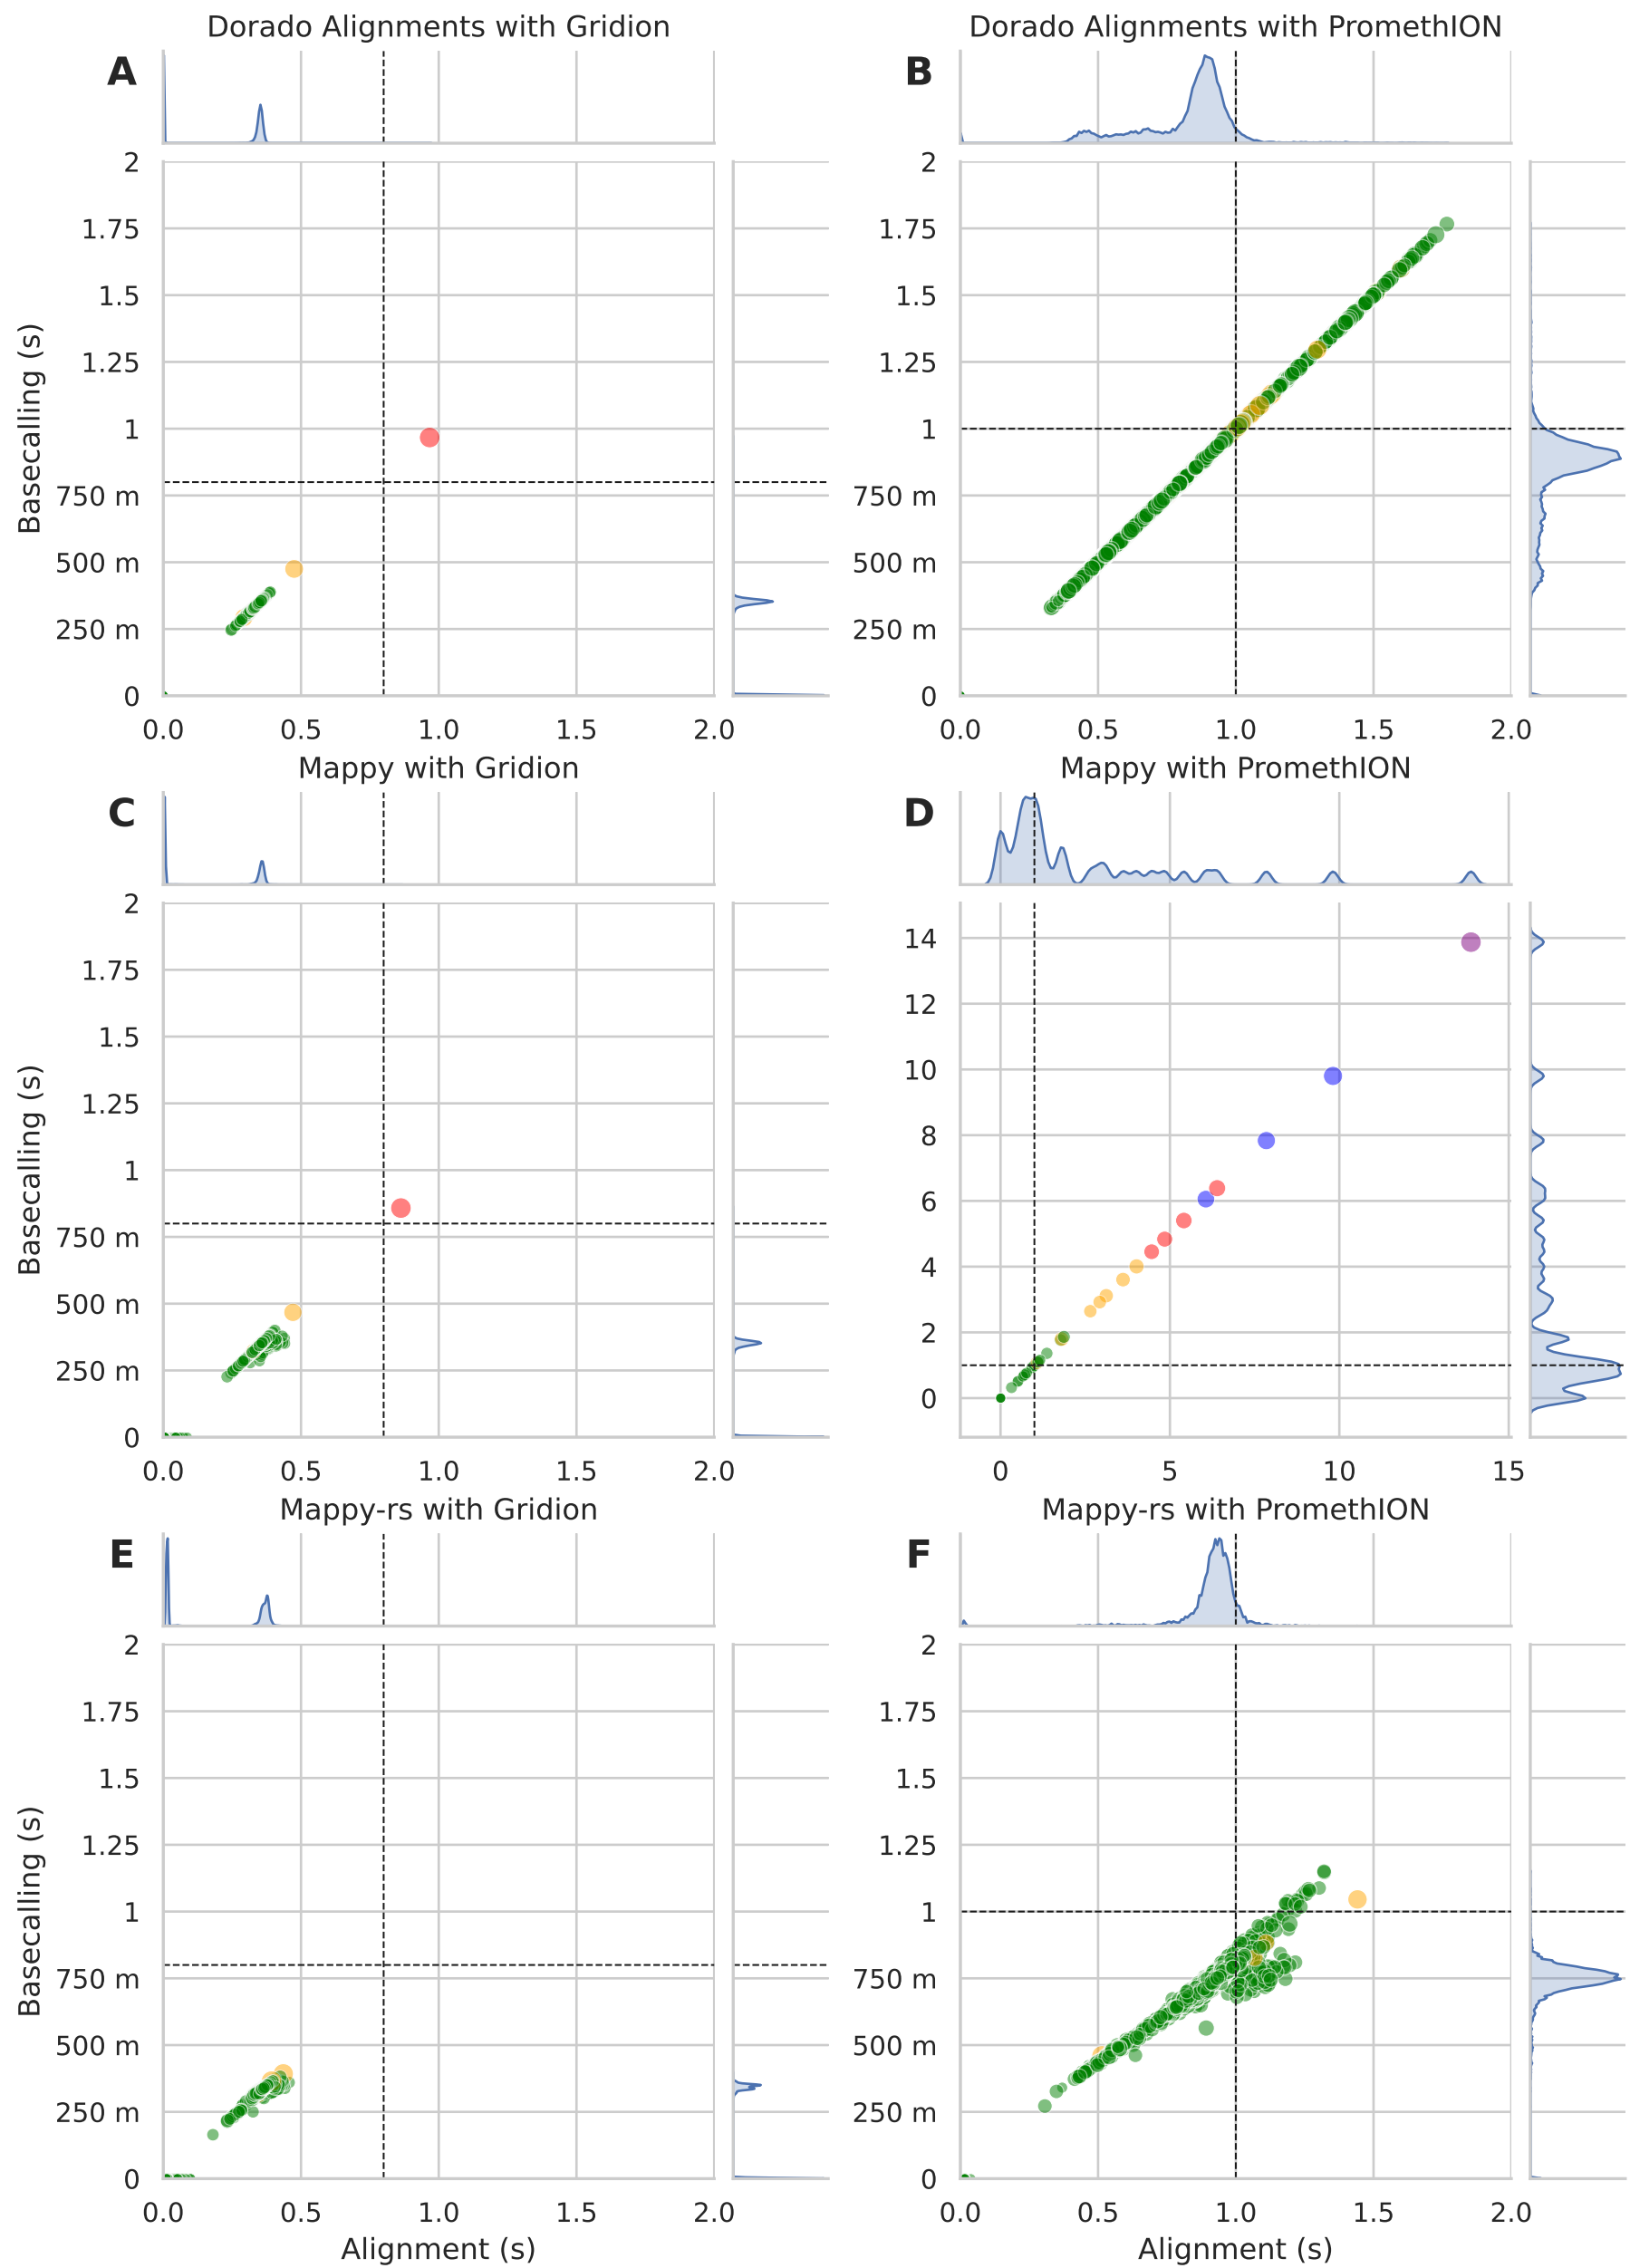

Supplement: Supplemental_Code.zip [file test_facetted_mean.pdf › barcode_paper_nb-GenomeResearch/figure_5/test_facetted_mean.pdf]

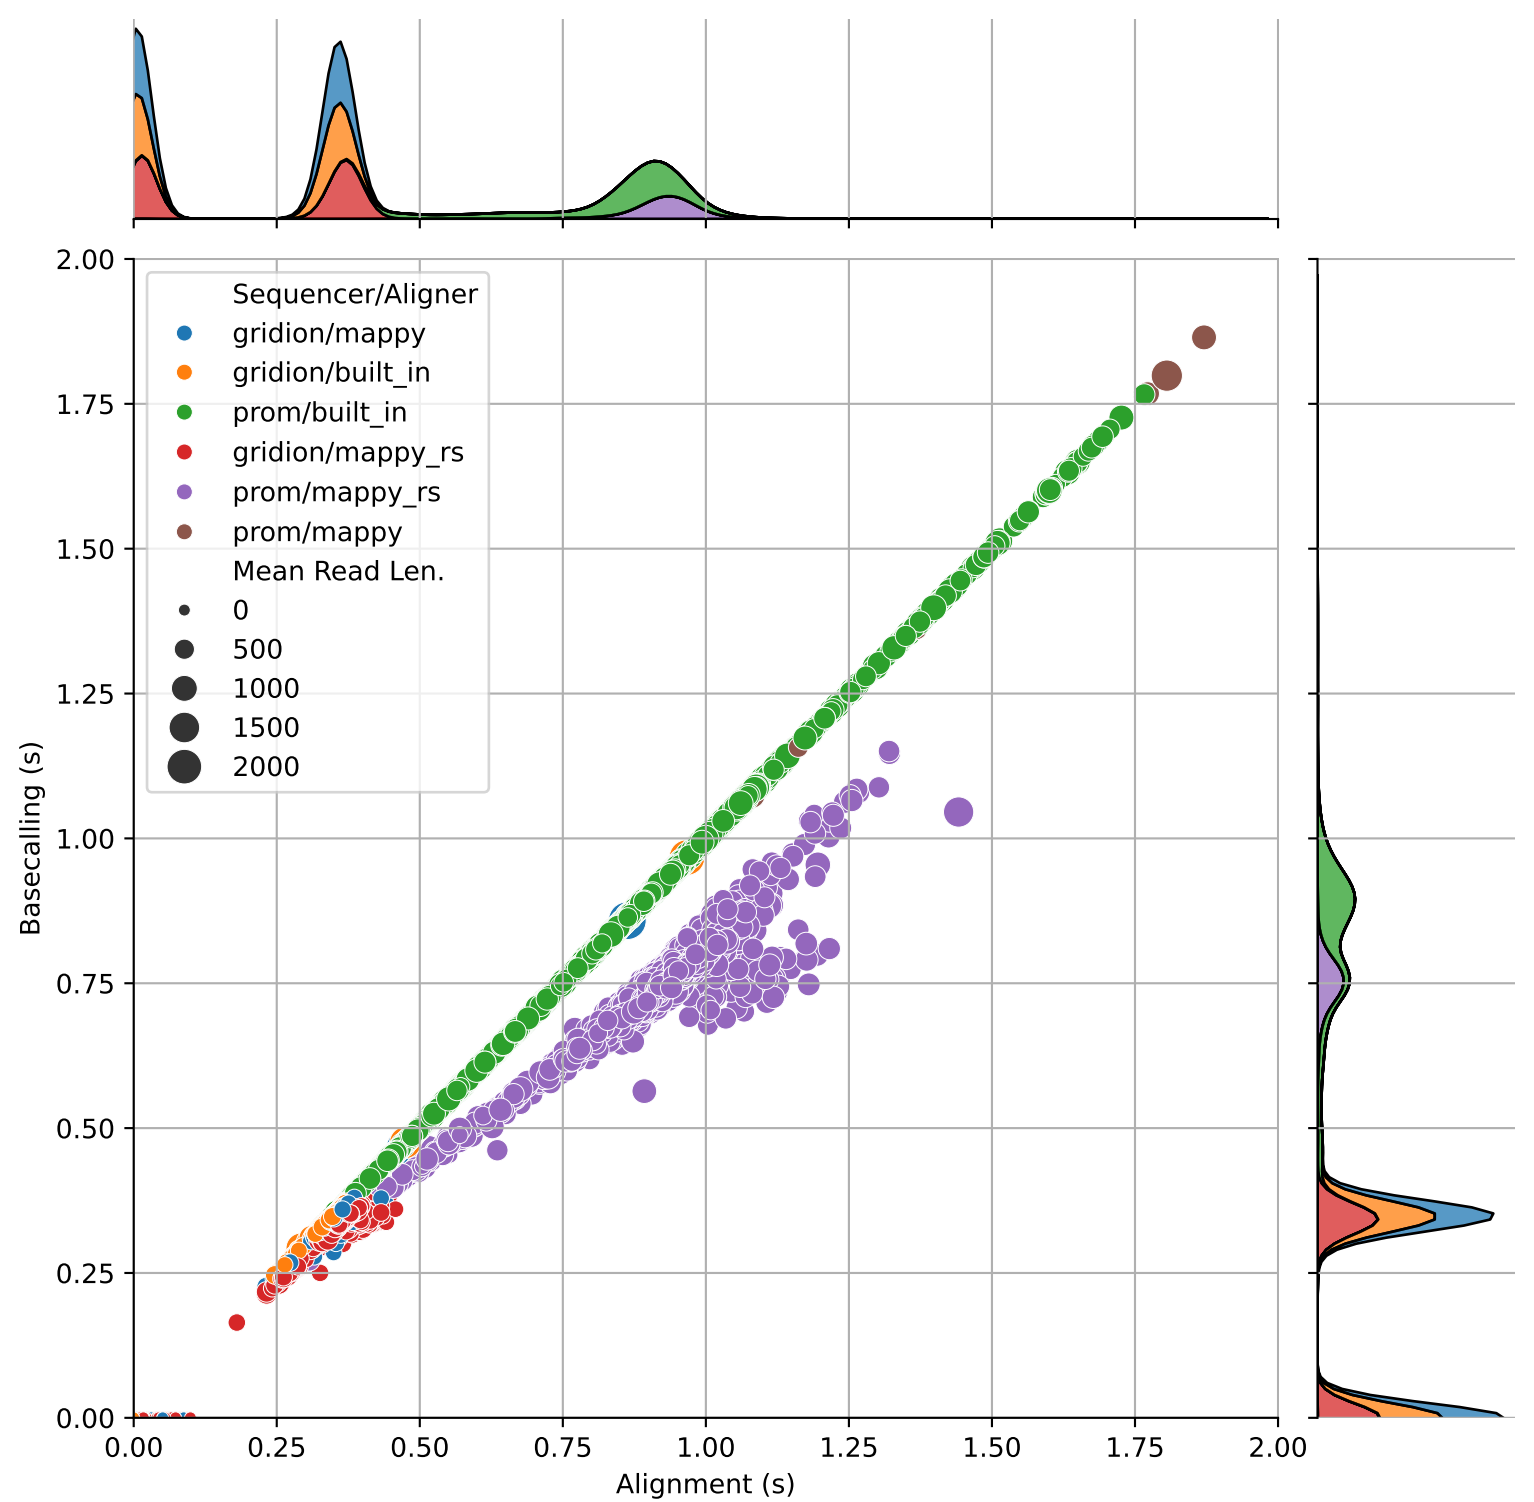

Supplement: Supplemental_Code.zip [file test_manual_weights.pdf › barcode_paper_nb-GenomeResearch/figure_5/test_manual_weights.pdf]

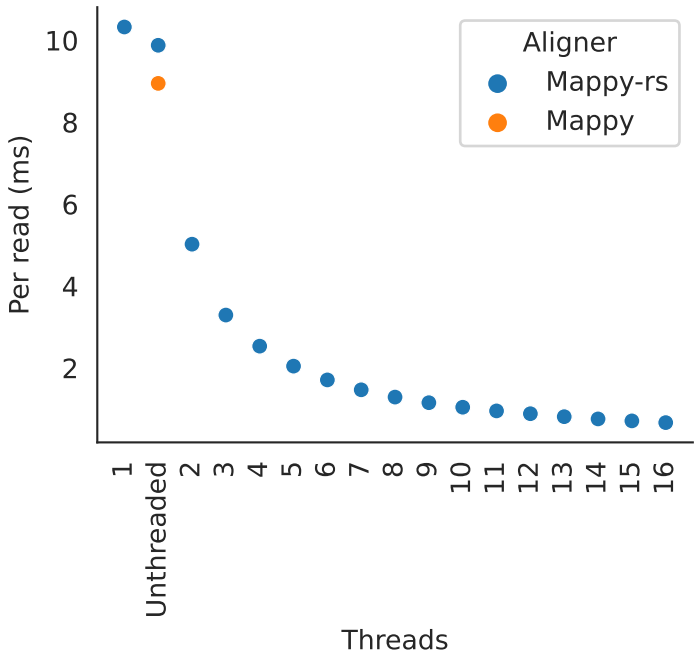

Supplement: Supplemental_Code.zip [file Supplemental_Fig_S1.pdf › barcode_paper_nb-GenomeResearch/supp_figure_1/Supplemental_Fig_S1.pdf]



Supplement: Supplemental_Code.zip [file mappy_rs_speed.pdf › barcode_paper_nb-GenomeResearch/supp_figure_1/mappy_rs_speed.pdf]

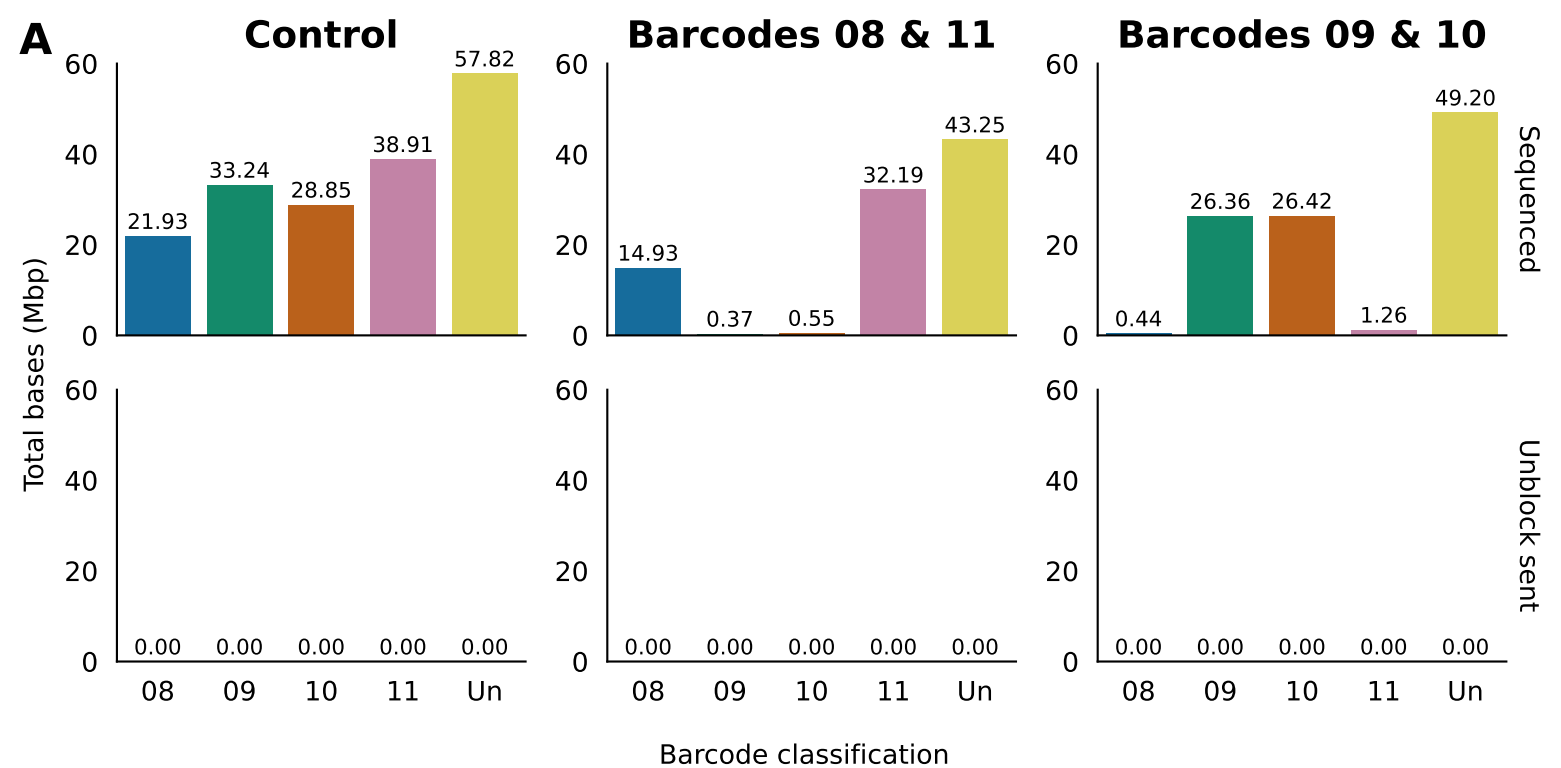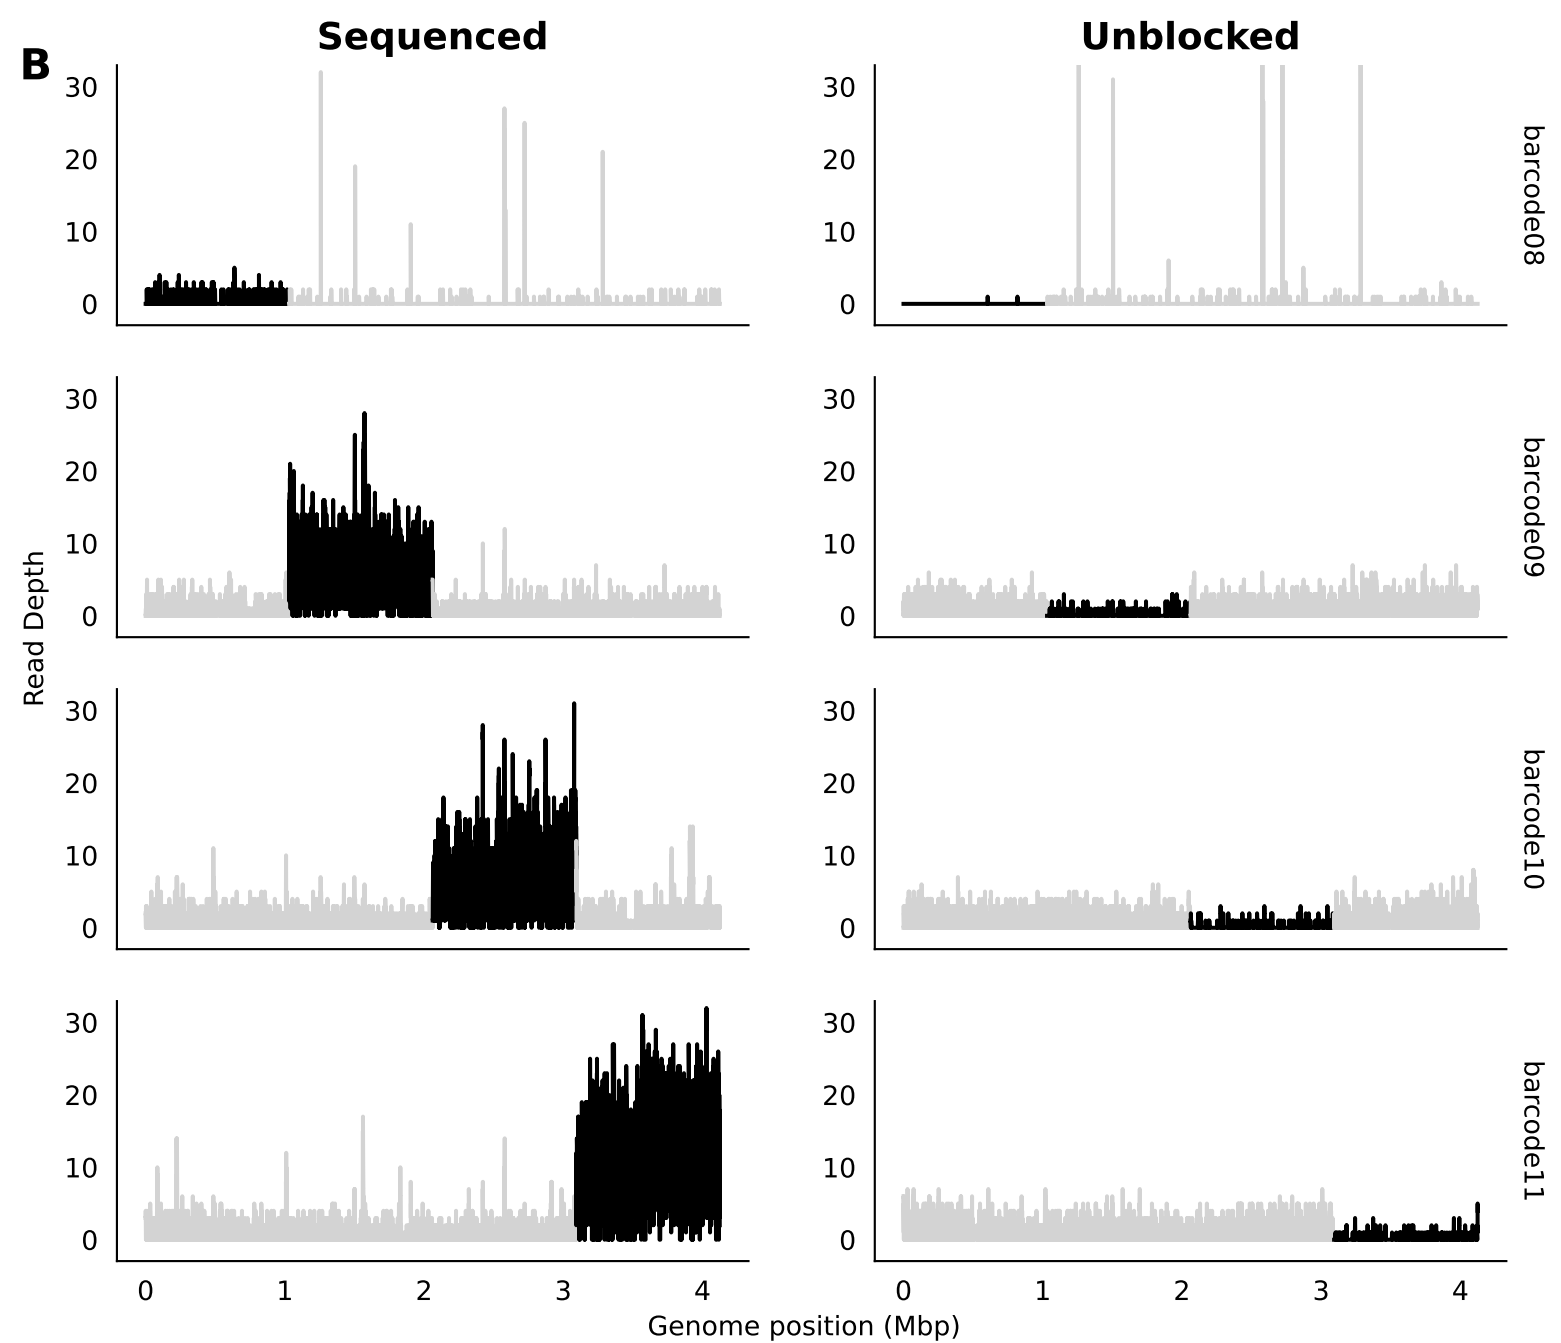

Supplement: Supplemental_Code.zip [file Supplemental_Fig_S2.pdf › barcode_paper_nb-GenomeResearch/supp_figure_2/Supplemental_Fig_S2.pdf]
